# Supplementary material for: Cu(Ⅱ) Coordination Polymers Containing Mixed Ligands with Different Flexibility: Structural Diversity and Iodine Adsorption
Source: Preprints.org preprint supplement (doi:10.20944/preprints202312.0220.v1), 2023-12-05

# checkCIF/PLATON report

Structure factors have been supplied for datablock(s) 1, 2, 3, 4, 5, 6

THIS REPORT IS FOR GUIDANCE ONLY. IF USED AS PART OF A REVIEW PROCEDURE FOR PUBLICATION, IT SHOULD NOT REPLACE THE EXPERTISE OF AN EXPERIENCED CRYSTALLOGRAPHIC REFEREE.

No syntax errors found.      CIF dictionary      Interpreting this report

## Datablock: 1

---

Bond precision:      C-C = 0.0064 Å      Wavelength=0.71073

Cell:                      a=10.1482(9)                      b=11.1855(10)                      c=11.7055(11)  
                              alpha=111.285(3)                      beta=97.429(3)                      gamma=108.425(3)  
Temperature:              296 K

|                        | Calculated             | Reported         |
|------------------------|------------------------|------------------|
| Volume                 | 1128.98(18)            | 1128.97(18)      |
| Space group            | P -1                   | P -1             |
| Hall group             | -P 1                   | -P 1             |
| Moiety formula         | C23 H18 Cu N4 O8, H2 O | ?                |
| Sum formula            | C23 H20 Cu N4 O9       | C23 H20 Cu N4 O9 |
| Mr                     | 559.98                 | 559.97           |
| Dx, g cm <sup>-3</sup> | 1.647                  | 1.647            |
| Z                      | 2                      | 2                |
| Mu (mm <sup>-1</sup> ) | 1.032                  | 1.032            |
| F000                   | 574.0                  | 574.0            |
| F000'                  | 574.92                 |                  |
| h, k, lmax             | 12, 13, 14             | 12, 13, 14       |
| Nref                   | 4437                   | 4415             |
| Tmin, Tmax             | 0.899, 0.961           | 0.591, 0.746     |
| Tmin'                  | 0.801                  |                  |

Correction method= # Reported T Limits: Tmin=0.591 Tmax=0.746  
AbsCorr = MULTI\_SCAN

Data completeness= 0.995      Theta(max)= 25.997

|                               |                   |
|-------------------------------|-------------------|
| R(reflections)= 0.0555( 3489) | wR2(reflections)= |
| S = 1.054                     | 0.1668( 4415)     |
| Npar= 338                     |                   |

---

The following ALERTS were generated. Each ALERT has the format

**test-name\_ALERT\_alert-type\_alert-level.**

Click on the hyperlinks for more details of the test.

---

### ● Alert level C

|                   |                                                             |               |
|-------------------|-------------------------------------------------------------|---------------|
| PLAT341_ALERT_3_C | Low Bond Precision on C-C Bonds .....                       | 0.00645 Ang.  |
| PLAT369_ALERT_2_C | Long C(sp <sup>2</sup> )-C(sp <sup>2</sup> ) Bond C7 - C8 . | 1.55 Ang.     |
| PLAT905_ALERT_3_C | Negative K value in the Analysis of Variance ...            | -1.362 Report |
| PLAT911_ALERT_3_C | Missing FCF Refl Between Thmin & STh/L= 0.600               | 19 Report     |

---

### ● Alert level G

|                   |                                                  |              |
|-------------------|--------------------------------------------------|--------------|
| PLAT004_ALERT_5_G | Polymeric Structure Found with Maximum Dimension | 2 Info       |
| PLAT007_ALERT_5_G | Number of Unrefined Donor-H Atoms .....          | 4 Report     |
| PLAT154_ALERT_1_G | The s.u.'s on the Cell Angles are Equal ..(Note) | 0.003 Degree |
| PLAT232_ALERT_2_G | Hirshfeld Test Diff (M-X) Cu --O4_e .            | 5.1 s.u.     |
| PLAT794_ALERT_5_G | Tentative Bond Valency for Cu (II) .             | 2.20 Info    |
| PLAT804_ALERT_5_G | Number of ARU-Code Packing Problem(s) in PLATON  | 17 Info      |
| PLAT883_ALERT_1_G | No Info/Value for _atom_sites_solution_primary . | Please Do !  |
| PLAT912_ALERT_4_G | Missing # of FCF Reflections Above STh/L= 0.600  | 4 Note       |
| PLAT967_ALERT_5_G | Note: Two-Theta Cutoff Value in Embedded .res .. | 52.0 Degree  |
| PLAT978_ALERT_2_G | Number C-C Bonds with Positive Residual Density. | 4 Info       |

---

0 **ALERT level A** = Most likely a serious problem - resolve or explain  
0 **ALERT level B** = A potentially serious problem, consider carefully  
4 **ALERT level C** = Check. Ensure it is not caused by an omission or oversight  
10 **ALERT level G** = General information/check it is not something unexpected

2 ALERT type 1 CIF construction/syntax error, inconsistent or missing data  
3 ALERT type 2 Indicator that the structure model may be wrong or deficient  
3 ALERT type 3 Indicator that the structure quality may be low  
1 ALERT type 4 Improvement, methodology, query or suggestion  
5 ALERT type 5 Informative message, check

---

## Datablock: 2

---

Bond precision: C-C = 0.0050 A

Wavelength=0.71073

Cell: a=8.9062(2) b=11.2565(3) c=22.7418(5)  
alpha=99.7718(14) beta=94.3827(15) gamma=105.8728(14)

Temperature: 296 K

|                        | Calculated                          | Reported                 |
|------------------------|-------------------------------------|--------------------------|
| Volume                 | 2142.96(9)                          | 2142.95(9)               |
| Space group            | P -1                                | P -1                     |
| Hall group             | -P 1                                | -P 1                     |
| Moiety formula         | C72 H88 Cu3 N12 O26, 10(H<br>O0.50) | ?                        |
| Sum formula            | C72 H106 Cu3 N12 O35                | C36 H53 Cu1.50 N6 O17.50 |
| Mr                     | 1890.34                             | 945.15                   |
| Dx, g cm <sup>-3</sup> | 1.465                               | 1.465                    |
| Z                      | 1                                   | 2                        |
| Mu (mm <sup>-1</sup> ) | 0.831                               | 0.831                    |
| F000                   | 989.0                               | 989.0                    |
| F000'                  | 990.46                              |                          |
| h, k, lmax             | 11, 15, 30                          | 11, 15, 30               |
| Nref                   | 10661                               | 10315                    |
| Tmin, Tmax             | 0.819, 0.920                        | 0.685, 0.746             |
| Tmin'                  | 0.717                               |                          |

Correction method= # Reported T Limits: Tmin=0.685 Tmax=0.746  
AbsCorr = MULTI\_SCAN

Data completeness= 0.968                      Theta(max)= 28.310

R(reflections)= 0.0550( 6028)                      wR2(reflections)=  
S = 1.015                      Npar= 556                      0.1452( 10315)

The following ALERTS were generated. Each ALERT has the format  
**test-name\_ALERT\_alert-type\_alert-level.**  
Click on the hyperlinks for more details of the test.

### ● Alert level C

|                   |                                           |         |       |                   |       |       |        |
|-------------------|-------------------------------------------|---------|-------|-------------------|-------|-------|--------|
| PLAT220_ALERT_2_C | NonSolvent                                | Resd 1  | O     | Ueq(max)/Ueq(min) | Range | 3.2   | Ratio  |
| PLAT260_ALERT_2_C | Large Average Ueq of Residue Including    |         |       |                   | O18   | 0.181 | Check  |
| PLAT314_ALERT_2_C | Small Angle for H2O: Metal-O12            |         | -H12D |                   | .     | 90.63 | Degree |
| PLAT314_ALERT_2_C | Small Angle for H2O: Metal-O15            |         | -H15D |                   | .     | 47.99 | Degree |
| PLAT314_ALERT_2_C | Small Angle for H2O: Metal-O15            |         | -H15E |                   | .     | 87.51 | Degree |
| PLAT906_ALERT_3_C | Large K Value in the Analysis of Variance | .....   |       |                   |       | 3.190 | Check  |
| PLAT911_ALERT_3_C | Missing FCF Refl Between Thmin & STh/L=   |         |       | 0.600             |       | 66    | Report |
| PLAT975_ALERT_2_C | Check Calcd Resid. Dens.                  | 0.41Ang | From  | O14               | .     | 0.52  | eA-3   |
| PLAT976_ALERT_2_C | Check Calcd Resid. Dens.                  | 0.57Ang | From  | O13               | .     | -0.53 | eA-3   |
| PLAT976_ALERT_2_C | Check Calcd Resid. Dens.                  | 0.97Ang | From  | O16               | .     | -0.46 | eA-3   |
| PLAT976_ALERT_2_C | Check Calcd Resid. Dens.                  | 1.07Ang | From  | O16               | .     | -0.44 | eA-3   |
| PLAT976_ALERT_2_C | Check Calcd Resid. Dens.                  | 0.92Ang | From  | O11               | .     | -0.42 | eA-3   |
| PLAT977_ALERT_2_C | Check Negative Difference Density on      | H11D    |       |                   | .     | -0.32 | eA-3   |
| PLAT977_ALERT_2_C | Check Negative Difference Density on      | H16B    |       |                   | .     | -0.42 | eA-3   |
| PLAT977_ALERT_2_C | Check Negative Difference Density on      | H16C    |       |                   | .     | -0.44 | eA-3   |

---

### ● Alert level G

|                   |                                                  |                |             |
|-------------------|--------------------------------------------------|----------------|-------------|
| PLAT004_ALERT_5_G | Polymeric Structure Found with Maximum Dimension | 2              | Info        |
| PLAT007_ALERT_5_G | Number of Unrefined Donor-H Atoms .....          | 21             | Report      |
| PLAT045_ALERT_1_G | Calculated and Reported Z Differ by a Factor ... | 0.500          | Check       |
| PLAT300_ALERT_4_G | Atom Site Occupancy of O18                       | Constrained at | 0.5 Check   |
| PLAT300_ALERT_4_G | Atom Site Occupancy of H18D                      | Constrained at | 0.5 Check   |
| PLAT300_ALERT_4_G | Atom Site Occupancy of H18E                      | Constrained at | 0.5 Check   |
| PLAT302_ALERT_4_G | Anion/Solvent/Minor-Residue Disorder (Resd 6 )   | 100%           | Note        |
| PLAT415_ALERT_2_G | Short Inter D-H..H-X                             | H18D ..H26A    | 2.07 Ang.   |
|                   |                                                  | 1-x,2-y,2-z =  | 2_677 Check |
| PLAT417_ALERT_2_G | Short Inter D-H..H-D                             | H14B ..H18E    | 2.11 Ang.   |
|                   |                                                  | x,y,z =        | 1_555 Check |
| PLAT794_ALERT_5_G | Tentative Bond Valency for Cu1                   | (II)           | 2.04 Info   |
| PLAT794_ALERT_5_G | Tentative Bond Valency for Cu2                   | (II)           | 2.10 Info   |
| PLAT804_ALERT_5_G | Number of ARU-Code Packing Problem(s) in PLATON  |                | 9 Info      |
| PLAT883_ALERT_1_G | No Info/Value for _atom_sites_solution_primary   |                | Please Do ! |
| PLAT899_ALERT_4_G | SHELXL2018 is Deprecated and Succeeded by SHELXL | 2019/3         | Note        |
| PLAT910_ALERT_3_G | Missing # of FCF Reflection(s) Below Theta(Min). | 1              | Note        |
| PLAT912_ALERT_4_G | Missing # of FCF Reflections Above STh/L= 0.600  | 280            | Note        |
| PLAT933_ALERT_2_G | Number of HKL-OMIT Records in Embedded .res File | 2              | Note        |
| PLAT941_ALERT_3_G | Average HKL Measurement Multiplicity .....       | 3.1            | Low         |
| PLAT978_ALERT_2_G | Number C-C Bonds with Positive Residual Density. | 0              | Info        |

---

0 **ALERT level A** = Most likely a serious problem - resolve or explain  
0 **ALERT level B** = A potentially serious problem, consider carefully  
15 **ALERT level C** = Check. Ensure it is not caused by an omission or oversight  
19 **ALERT level G** = General information/check it is not something unexpected

2 ALERT type 1 CIF construction/syntax error, inconsistent or missing data  
17 ALERT type 2 Indicator that the structure model may be wrong or deficient  
4 ALERT type 3 Indicator that the structure quality may be low  
6 ALERT type 4 Improvement, methodology, query or suggestion  
5 ALERT type 5 Informative message, check

---

## Datablock: 3

---

Bond precision: C-C = 0.0047 A                      Wavelength=0.71073

Cell:                      a=18.8531(6)              b=25.8032(8)              c=17.4503(6)  
                            alpha=90                      beta=99.4362(19)              gamma=90

Temperature:              191 K

|                        | Calculated                      | Reported         |
|------------------------|---------------------------------|------------------|
| Volume                 | 8374.2(5)                       | 8374.2(5)        |
| Space group            | C 2/c                           | C 2/c            |
| Hall group             | -C 2yc                          | -C 2yc           |
| Moiety formula         | C36 H27 Cu N2 O7 [+<br>solvent] | ?                |
| Sum formula            | C36 H27 Cu N2 O7 [+<br>solvent] | C36 H27 Cu N2 O7 |
| Mr                     | 663.15                          | 663.13           |
| Dx, g cm <sup>-3</sup> | 1.052                           | 1.052            |
| Z                      | 8                               | 8                |
| Mu (mm <sup>-1</sup> ) | 0.561                           | 0.561            |
| F000                   | 2736.0                          | 2736.0           |
| F000'                  | 2739.75                         |                  |
| h,k,lmax               | 25,34,23                        | 25,34,23         |
| Nref                   | 10430                           | 10067            |
| Tmin,Tmax              | 0.935,0.945                     | 0.674,0.746      |
| Tmin'                  | 0.845                           |                  |

Correction method= # Reported T Limits: Tmin=0.674 Tmax=0.746

AbsCorr = MULTI\_SCAN

Data completeness= 0.965

Theta(max)= 28.311

R(reflections)= 0.0536( 6062)

wR2(reflections)=  
0.1345( 10067)

S = 0.990

Npar= 432

The following ALERTS were generated. Each ALERT has the format

**test-name\_ALERT\_alert-type\_alert-level.**

Click on the hyperlinks for more details of the test.

### Alert level C

|                   |                                                  |                                 |        |              |
|-------------------|--------------------------------------------------|---------------------------------|--------|--------------|
| PLAT213_ALERT_2_C | Atom C35                                         | has ADP max/min Ratio .....     | 3.2    | prolat       |
| PLAT213_ALERT_2_C | Atom C36                                         | has ADP max/min Ratio .....     | 3.9    | prolat       |
| PLAT220_ALERT_2_C | NonSolvent Resd 1 C                              | Ueq(max)/Ueq(min) Range         | 4.6    | Ratio        |
| PLAT220_ALERT_2_C | NonSolvent Resd 1 O                              | Ueq(max)/Ueq(min) Range         | 4.1    | Ratio        |
| PLAT222_ALERT_3_C | NonSolvent Resd 1 H                              | Uiso(max)/Uiso(min) Range       | 5.0    | Ratio        |
| PLAT241_ALERT_2_C | High 'MainMol'                                   | Ueq as Compared to Neighbors of | N2     | Check        |
| PLAT242_ALERT_2_C | Low 'MainMol'                                    | Ueq as Compared to Neighbors of | N1     | Check        |
| PLAT242_ALERT_2_C | Low 'MainMol'                                    | Ueq as Compared to Neighbors of | C4     | Check        |
| PLAT242_ALERT_2_C | Low 'MainMol'                                    | Ueq as Compared to Neighbors of | C27    | Check        |
| PLAT250_ALERT_2_C | Large U3/U1 Ratio for Average U(i,j) Tensor .... |                                 | 2.3    | Note         |
| PLAT360_ALERT_2_C | Short C(sp3)-C(sp3) Bond C8 - C9 .               |                                 | 1.42   | Ang.         |
| PLAT420_ALERT_2_C | D-H Bond Without Acceptor N2 --H2A .             |                                 |        | Please Check |
| PLAT905_ALERT_3_C | Negative K value in the Analysis of Variance ... |                                 | -2.133 | Report       |
| PLAT911_ALERT_3_C | Missing FCF Refl Between Thmin & STh/L= 0.600    |                                 | 144    | Report       |

---

## ● Alert level G

|                   |                                                  |       |        |        |
|-------------------|--------------------------------------------------|-------|--------|--------|
| PLAT007_ALERT_5_G | Number of Unrefined Donor-H Atoms .....          |       | 1      | Report |
| PLAT171_ALERT_4_G | The CIF-Embedded .res File Contains EADP Records |       | 2      | Report |
| PLAT301_ALERT_3_G | Main Residue Disorder .....(Resd 1 )             |       | 20%    | Note   |
| PLAT410_ALERT_2_G | Short Intra H...H Contact H18A ..H31A .          |       | 2.14   | Ang.   |
|                   | x,y,z =                                          | 1_555 | Check  |        |
| PLAT410_ALERT_2_G | Short Intra H...H Contact H18A ..H31B .          |       | 1.98   | Ang.   |
|                   | x,y,z =                                          | 1_555 | Check  |        |
| PLAT410_ALERT_2_G | Short Intra H...H Contact H20A ..H36A .          |       | 1.93   | Ang.   |
|                   | x,y,z =                                          | 1_555 | Check  |        |
| PLAT606_ALERT_4_G | Solvent Accessible VOID(S) in Structure .....    |       | !      | Info   |
| PLAT720_ALERT_4_G | Number of Unusual/Non-Standard Labels .....      |       | 3      | Note   |
| PLAT773_ALERT_2_G | Check long C-C Bond in CIF: C2 --C3              |       | 1.90   | Ang.   |
| PLAT804_ALERT_5_G | Number of ARU-Code Packing Problem(s) in PLATON  |       | 1      | Info   |
| PLAT869_ALERT_4_G | ALERTS Related to the Use of SQUEEZE Suppressed  |       | !      | Info   |
| PLAT883_ALERT_1_G | No Info/Value for _atom_sites_solution_primary . |       | Please | Do !   |
| PLAT899_ALERT_4_G | SHELXL2018 is Deprecated and Succeeded by SHELXL |       | 2019/3 | Note   |
| PLAT910_ALERT_3_G | Missing # of FCF Reflection(s) Below Theta(Min). |       | 2      | Note   |
| PLAT912_ALERT_4_G | Missing # of FCF Reflections Above STh/L= 0.600  |       | 217    | Note   |
| PLAT913_ALERT_3_G | Missing # of Very Strong Reflections in FCF .... |       | 1      | Note   |
| PLAT941_ALERT_3_G | Average HKL Measurement Multiplicity .....       |       | 3.0    | Low    |
| PLAT978_ALERT_2_G | Number C-C Bonds with Positive Residual Density. |       | 3      | Info   |

---

0 **ALERT level A** = Most likely a serious problem - resolve or explain  
0 **ALERT level B** = A potentially serious problem, consider carefully  
14 **ALERT level C** = Check. Ensure it is not caused by an omission or oversight  
18 **ALERT level G** = General information/check it is not something unexpected

1 ALERT type 1 CIF construction/syntax error, inconsistent or missing data  
16 ALERT type 2 Indicator that the structure model may be wrong or deficient  
7 ALERT type 3 Indicator that the structure quality may be low  
6 ALERT type 4 Improvement, methodology, query or suggestion  
2 ALERT type 5 Informative message, check

---

## Datablock: 4

---

Bond precision: C-C = 0.0032 A Wavelength=0.71073

Cell: a=16.5969(4) b=13.9067(4) c=17.6110(5)  
alpha=90 beta=90.2248(9) gamma=90

Temperature: 296 K



|                   |                                                  |                    |       |              |
|-------------------|--------------------------------------------------|--------------------|-------|--------------|
| PLAT300_ALERT_4_G | Atom Site Occupancy of C10                       | Constrained at     | 0.5   | Check        |
| PLAT300_ALERT_4_G | Atom Site Occupancy of C10'                      | Constrained at     | 0.5   | Check        |
| PLAT300_ALERT_4_G | Atom Site Occupancy of C11                       | Constrained at     | 0.5   | Check        |
| PLAT300_ALERT_4_G | Atom Site Occupancy of C11'                      | Constrained at     | 0.5   | Check        |
| PLAT300_ALERT_4_G | Atom Site Occupancy of H10A                      | Constrained at     | 0.5   | Check        |
| PLAT300_ALERT_4_G | Atom Site Occupancy of H10B                      | Constrained at     | 0.5   | Check        |
| PLAT300_ALERT_4_G | Atom Site Occupancy of H10C                      | Constrained at     | 0.5   | Check        |
| PLAT300_ALERT_4_G | Atom Site Occupancy of H10D                      | Constrained at     | 0.5   | Check        |
| PLAT300_ALERT_4_G | Atom Site Occupancy of H11A                      | Constrained at     | 0.5   | Check        |
| PLAT300_ALERT_4_G | Atom Site Occupancy of H11B                      | Constrained at     | 0.5   | Check        |
| PLAT300_ALERT_4_G | Atom Site Occupancy of H11C                      | Constrained at     | 0.5   | Check        |
| PLAT300_ALERT_4_G | Atom Site Occupancy of H11D                      | Constrained at     | 0.5   | Check        |
| PLAT301_ALERT_3_G | Main Residue Disorder .....                      | (Resd 1 )          | 6%    | Note         |
| PLAT303_ALERT_2_G | Full Occupancy Atom H8C                          | with # Connections | 2.00  | Check        |
| PLAT367_ALERT_2_G | Long? C(sp?)-C(sp?) Bond                         | C8 - C9            | 1.52  | Ang.         |
| PLAT410_ALERT_2_G | Short Intra H...H Contact                        | H9B ..H10C         | 1.99  | Ang.         |
|                   |                                                  | x,y,z =            | 1_555 | Check        |
| PLAT432_ALERT_2_G | Short Inter X...Y Contact                        | O4 ..C1            | 2.86  | Ang.         |
|                   |                                                  | 1+x,y,z =          | 1_655 | Check        |
| PLAT764_ALERT_4_G | Overcomplete CIF Bond List Detected (Rep/Expd)   | .                  | 1.20  | Ratio        |
| PLAT794_ALERT_5_G | Tentative Bond Valency for Cu1                   | (II)               | 2.13  | Info         |
| PLAT794_ALERT_5_G | Tentative Bond Valency for Cu2                   | (II)               | 2.12  | Info         |
| PLAT883_ALERT_1_G | No Info/Value for _atom_sites_solution_primary   | .                  |       | Please Do !  |
| PLAT912_ALERT_4_G | Missing # of FCF Reflections Above STh/L=        | 0.600              | 1     | Note         |
| PLAT913_ALERT_3_G | Missing # of Very Strong Reflections in FCF .... |                    | 3     | Note         |
| PLAT965_ALERT_2_G | The SHELXL WEIGHT Optimisation has not Converged |                    |       | Please Check |
| PLAT978_ALERT_2_G | Number C-C Bonds with Positive Residual Density. |                    | 10    | Info         |

---

0 **ALERT level A** = Most likely a serious problem - resolve or explain  
 1 **ALERT level B** = A potentially serious problem, consider carefully  
 4 **ALERT level C** = Check. Ensure it is not caused by an omission or oversight  
 29 **ALERT level G** = General information/check it is not something unexpected

2 ALERT type 1 CIF construction/syntax error, inconsistent or missing data  
 9 ALERT type 2 Indicator that the structure model may be wrong or deficient  
 3 ALERT type 3 Indicator that the structure quality may be low  
 16 ALERT type 4 Improvement, methodology, query or suggestion  
 4 ALERT type 5 Informative message, check

---

## Datablock: 5

---

|                 |                |                    |
|-----------------|----------------|--------------------|
| Bond precision: | C-C = 0.0114 A | Wavelength=0.71073 |
| Cell:           | a=20.9682(10)  | b=25.3489(11)      |
|                 | alpha=90       | beta=90            |
|                 |                | c=18.1699(8)       |
| Temperature:    | 165 K          | gamma=90           |



|                        | Calculated                                           | Reported                   |
|------------------------|------------------------------------------------------|----------------------------|
| Volume                 | 9657.7(8)                                            | 9657.7(8)                  |
| Space group            | P n a 21                                             | P n a 21                   |
| Hall group             | P 2c -2n                                             | P 2c -2n                   |
| Moiety formula         | 2(C98 H84 Cu3 N8 O16),<br>6(C0.50 H2 O0.50), 4(H2 O) | ?                          |
| Sum formula            | C201 H196 Cu6 N16 O41                                | C100.50 H104 Cu3 N8 O20.50 |
| Mr                     | 3873.05                                              | 1942.53                    |
| Dx, g cm <sup>-3</sup> | 1.332                                                | 1.336                      |
| Z                      | 2                                                    | 4                          |
| Mu (mm <sup>-1</sup> ) | 0.728                                                | 0.728                      |
| F000                   | 4032.0                                               | 4056.0                     |
| F000'                  | 4037.53                                              |                            |
| h,k,lmax               | 25,31,22                                             | 25,31,22                   |
| Nref                   | 19005[ 9820]                                         | 18994                      |
| Tmin,Tmax              | 0.840,0.930                                          | 0.672,0.746                |
| Tmin'                  | 0.695                                                |                            |

Correction method= # Reported T Limits: Tmin=0.672 Tmax=0.746  
AbsCorr = MULTI\_SCAN

Data completeness= 1.93/1.00                      Theta(max)= 25.999

R(reflections)= 0.0526( 15949)                      wR2(reflections)=  
S = 1.026                      Npar= 1157                      0.1503( 18994)

The following ALERTS were generated. Each ALERT has the format  
**test-name\_ALERT\_alert-type\_alert-level.**  
Click on the hyperlinks for more details of the test.

### ● Alert level C

|                   |                                                  |                |              |
|-------------------|--------------------------------------------------|----------------|--------------|
| PLAT041_ALERT_1_C | Calc. and Reported SumFormula                    | Strings Differ | Please Check |
| PLAT043_ALERT_1_C | Calculated and Reported Mol. Weight Differ by .. | 12.01          | Check        |
| PLAT068_ALERT_1_C | Reported F000 Differs from Calcd (or Missing)... |                | Please Check |
| PLAT214_ALERT_2_C | Atom C99 (Anion/Solvent) ADP max/min Ratio       | 4.1            | prolat       |
| PLAT220_ALERT_2_C | NonSolvent Resd 1 C Ueq(max)/Ueq(min) Range      | 5.1            | Ratio        |
| PLAT220_ALERT_2_C | NonSolvent Resd 1 N Ueq(max)/Ueq(min) Range      | 3.2            | Ratio        |
| PLAT220_ALERT_2_C | NonSolvent Resd 1 O Ueq(max)/Ueq(min) Range      | 4.6            | Ratio        |
| PLAT222_ALERT_3_C | NonSolvent Resd 1 H Uiso(max)/Uiso(min) Range    | 4.2            | Ratio        |
| PLAT241_ALERT_2_C | High 'MainMol' Ueq as Compared to Neighbors of   | C8             | Check        |
| PLAT241_ALERT_2_C | High 'MainMol' Ueq as Compared to Neighbors of   | C39            | Check        |
| PLAT242_ALERT_2_C | Low 'MainMol' Ueq as Compared to Neighbors of    | N7             | Check        |
| PLAT242_ALERT_2_C | Low 'MainMol' Ueq as Compared to Neighbors of    | N8             | Check        |
| PLAT260_ALERT_2_C | Large Average Ueq of Residue Including           | 017            | 0.205 Check  |
| PLAT260_ALERT_2_C | Large Average Ueq of Residue Including           | 018            | 0.121 Check  |
| PLAT260_ALERT_2_C | Large Average Ueq of Residue Including           | 021            | 0.102 Check  |
| PLAT309_ALERT_2_C | Single Bonded Oxygen (C-O > 1.3 Ang) .....       | 02             | Check        |

PLAT341\_ALERT\_3\_C Low Bond Precision on C-C Bonds ..... 0.01138 Ang.  
 PLAT911\_ALERT\_3\_C Missing FCF Refl Between Thmin & STh/L= 0.600 5 Report  
 PLAT975\_ALERT\_2\_C Check Calcd Resid. Dens. 0.81Ang From O19 . 0.88 eA-3  
 PLAT975\_ALERT\_2\_C Check Calcd Resid. Dens. 1.03Ang From O4 . 0.43 eA-3

## Alert level G

FORMU01\_ALERT\_2\_G There is a discrepancy between the atom counts in the  
   \_chemical\_formula\_sum and the formula from the \_atom\_site\* data.  
   Atom count from \_chemical\_formula\_sum: C100.5 H104 Cu3 N8 O20.5  
   Atom count from the \_atom\_site data: C100.5 H98 Cu3 N8 O20.5  
 CELLZ01\_ALERT\_1\_G Difference between formula and atom\_site contents detected.  
 CELLZ01\_ALERT\_1\_G WARNING: H atoms missing from atom site list. Is this intentional?  
   From the CIF: \_cell\_formula\_units\_Z 4  
   From the CIF: \_chemical\_formula\_sum C100.50 H104 Cu3 N8 O20.50  
 TEST: Compare cell contents of formula and atom\_site data

| atom | Z*formula | cif sites | diff  |
|------|-----------|-----------|-------|
| C    | 402.00    | 402.00    | 0.00  |
| H    | 416.00    | 392.00    | 24.00 |
| Cu   | 12.00     | 12.00     | 0.00  |
| N    | 32.00     | 32.00     | 0.00  |
| O    | 82.00     | 82.00     | 0.00  |

|                   |                                                  |                |           |
|-------------------|--------------------------------------------------|----------------|-----------|
| PLAT002_ALERT_2_G | Number of Distance or Angle Restraints on AtSite | 12             | Note      |
| PLAT003_ALERT_2_G | Number of Uiso or Uij Restrained non-H Atoms ... | 110            | Report    |
| PLAT004_ALERT_5_G | Polymeric Structure Found with Maximum Dimension | 3              | Info      |
| PLAT007_ALERT_5_G | Number of Unrefined Donor-H Atoms .....          | 11             | Report    |
| PLAT045_ALERT_1_G | Calculated and Reported Z Differ by a Factor ... | 0.500          | Check     |
| PLAT083_ALERT_2_G | SHELXL Second Parameter in WGHT Unusually Large  | 10.24          | Why ?     |
| PLAT171_ALERT_4_G | The CIF-Embedded .res File Contains EADP Records | 2              | Report    |
| PLAT172_ALERT_4_G | The CIF-Embedded .res File Contains DFIX Records | 4              | Report    |
| PLAT178_ALERT_4_G | The CIF-Embedded .res File Contains SIMU Records | 1              | Report    |
| PLAT188_ALERT_3_G | A Non-default SIMU Restraint Value has been used | 0.0100         | Report    |
| PLAT300_ALERT_4_G | Atom Site Occupancy of O2                        | Constrained at | 0.5 Check |
| PLAT300_ALERT_4_G | Atom Site Occupancy of O2'                       | Constrained at | 0.5 Check |
| PLAT300_ALERT_4_G | Atom Site Occupancy of C9                        | Constrained at | 0.5 Check |
| PLAT300_ALERT_4_G | Atom Site Occupancy of C9'                       | Constrained at | 0.5 Check |
| PLAT300_ALERT_4_G | Atom Site Occupancy of C10                       | Constrained at | 0.5 Check |
| PLAT300_ALERT_4_G | Atom Site Occupancy of C10'                      | Constrained at | 0.5 Check |
| PLAT300_ALERT_4_G | Atom Site Occupancy of C11                       | Constrained at | 0.5 Check |
| PLAT300_ALERT_4_G | Atom Site Occupancy of C11'                      | Constrained at | 0.5 Check |
| PLAT300_ALERT_4_G | Atom Site Occupancy of C12                       | Constrained at | 0.5 Check |
| PLAT300_ALERT_4_G | Atom Site Occupancy of C12'                      | Constrained at | 0.5 Check |
| PLAT300_ALERT_4_G | Atom Site Occupancy of C13                       | Constrained at | 0.5 Check |
| PLAT300_ALERT_4_G | Atom Site Occupancy of C13'                      | Constrained at | 0.5 Check |
| PLAT300_ALERT_4_G | Atom Site Occupancy of C14                       | Constrained at | 0.5 Check |
| PLAT300_ALERT_4_G | Atom Site Occupancy of C14'                      | Constrained at | 0.5 Check |
| PLAT300_ALERT_4_G | Atom Site Occupancy of C15                       | Constrained at | 0.5 Check |
| PLAT300_ALERT_4_G | Atom Site Occupancy of C15'                      | Constrained at | 0.5 Check |
| PLAT300_ALERT_4_G | Atom Site Occupancy of C16                       | Constrained at | 0.5 Check |
| PLAT300_ALERT_4_G | Atom Site Occupancy of C16'                      | Constrained at | 0.5 Check |
| PLAT300_ALERT_4_G | Atom Site Occupancy of C33                       | Constrained at | 0.5 Check |
| PLAT300_ALERT_4_G | Atom Site Occupancy of C33'                      | Constrained at | 0.5 Check |
| PLAT300_ALERT_4_G | Atom Site Occupancy of C34                       | Constrained at | 0.5 Check |
| PLAT300_ALERT_4_G | Atom Site Occupancy of C34'                      | Constrained at | 0.5 Check |
| PLAT300_ALERT_4_G | Atom Site Occupancy of C35                       | Constrained at | 0.5 Check |
| PLAT300_ALERT_4_G | Atom Site Occupancy of C35'                      | Constrained at | 0.5 Check |

[illegible]

|                                                                    |                     |       |              |
|--------------------------------------------------------------------|---------------------|-------|--------------|
| PLAT413_ALERT_2_G Short Inter XH3 .. XHn                           | H10E ..H14D         | .     | 2.12 Ang.    |
|                                                                    | -1/2+x,-1/2-y,1+z = | 3_446 | Check        |
| PLAT414_ALERT_2_G Short Intra D-H..H-X                             | H7A ..H36D          | .     | 1.95 Ang.    |
|                                                                    | x,y,z =             | 1_555 | Check        |
| PLAT417_ALERT_2_G Short Inter D-H..H-D                             | H6A ..H190          | .     | 2.08 Ang.    |
|                                                                    | x,y,z =             | 1_555 | Check        |
| PLAT417_ALERT_2_G Short Inter D-H..H-D                             | H190 ..H21B         | .     | 1.92 Ang.    |
|                                                                    | -x,-y,3/2+z =       | 2_556 | Check        |
| PLAT417_ALERT_2_G Short Inter D-H..H-D                             | H190 ..H21D         | .     | 2.12 Ang.    |
|                                                                    | -x,-y,3/2+z =       | 2_556 | Check        |
| PLAT720_ALERT_4_G Number of Unusual/Non-Standard Labels .....      |                     |       | 2 Note       |
| PLAT773_ALERT_2_G Check long C-C Bond in CIF: C34'                 | --C35'              |       | 1.71 Ang.    |
| PLAT794_ALERT_5_G Tentative Bond Valency for Cu1                   | (II)                | .     | 2.14 Info    |
| PLAT794_ALERT_5_G Tentative Bond Valency for Cu2                   | (II)                | .     | 2.20 Info    |
| PLAT804_ALERT_5_G Number of ARU-Code Packing Problem(s) in PLATON  |                     |       | 16 Info      |
| PLAT860_ALERT_3_G Number of Least-Squares Restraints .....         |                     |       | 2119 Note    |
| PLAT883_ALERT_1_G No Info/Value for _atom_sites_solution_primary   |                     |       | Please Do !  |
| PLAT910_ALERT_3_G Missing # of FCF Reflection(s) Below Theta(Min). |                     |       | 1 Note       |
| PLAT933_ALERT_2_G Number of HKL-OMIT Records in Embedded .res File |                     |       | 5 Note       |
| PLAT965_ALERT_2_G The SHELXL WEIGHT Optimisation has not Converged |                     |       | Please Check |
| PLAT967_ALERT_5_G Note: Two-Theta Cutoff Value in Embedded .res .. |                     |       | 52.0 Degree  |
| PLAT978_ALERT_2_G Number C-C Bonds with Positive Residual Density. |                     |       | 1 Info       |

---

0 **ALERT level A** = Most likely a serious problem - resolve or explain  
 0 **ALERT level B** = A potentially serious problem, consider carefully  
 20 **ALERT level C** = Check. Ensure it is not caused by an omission or oversight  
 111 **ALERT level G** = General information/check it is not something unexpected

7 ALERT type 1 CIF construction/syntax error, inconsistent or missing data  
 30 ALERT type 2 Indicator that the structure model may be wrong or deficient  
 7 ALERT type 3 Indicator that the structure quality may be low  
 81 ALERT type 4 Improvement, methodology, query or suggestion  
 6 ALERT type 5 Informative message, check

---

## Datablock: 6

---

|                 |                |                             |
|-----------------|----------------|-----------------------------|
| Bond precision: | C-C = 0.0107 A | Wavelength=0.71073          |
| Cell:           | a=22.0739(18)  | b=24.3392(18) c=17.9481(15) |
|                 | alpha=90       | beta=90 gamma=90            |
| Temperature:    | 293 K          |                             |

|                        | Calculated                                | Reported             |
|------------------------|-------------------------------------------|----------------------|
| Volume                 | 9642.8(13)                                | 9642.8(13)           |
| Space group            | P n a 21                                  | P n a 21             |
| Hall group             | P 2c -2n                                  | P 2c -2n             |
| Moiety formula         | C98 H88 Cu3 N8 O16, C3 H7 N<br>O, 2(H2 O) | ?                    |
| Sum formula            | C101 H99 Cu3 N9 O19                       | C101 H101 Cu3 N9 O19 |
| Mr                     | 1933.55                                   | 1935.52              |
| Dx, g cm <sup>-3</sup> | 1.332                                     | 1.333                |
| Z                      | 4                                         | 4                    |
| Mu (mm <sup>-1</sup> ) | 0.728                                     | 0.728                |
| F000                   | 4028.0                                    | 4036.0               |
| F000'                  | 4033.48                                   |                      |
| h,k,lmax               | 29,32,23                                  | 29,32,23             |
| Nref                   | 24020[ 12386]                             | 20288                |
| Tmin,Tmax              | 0.840,0.930                               | 0.690,0.746          |
| Tmin'                  | 0.747                                     |                      |

Correction method= # Reported T Limits: Tmin=0.690 Tmax=0.746  
AbsCorr = MULTI\_SCAN

Data completeness= 1.64/0.84                      Theta(max)= 28.316

R(reflections)= 0.0571( 11504)                      wR2(reflections)=  
0.1244( 20288)  
S = 1.002                      Npar= 1181

The following ALERTS were generated. Each ALERT has the format  
**test-name\_ALERT\_alert-type\_alert-level.**  
Click on the hyperlinks for more details of the test.

### Alert level C

|                   |                                                  |                                   |              |
|-------------------|--------------------------------------------------|-----------------------------------|--------------|
| PLAT041_ALERT_1_C | Calc. and Reported SumFormula                    | Strings Differ                    | Please Check |
| PLAT068_ALERT_1_C | Reported F000 Differs from Calcd (or Missing)... |                                   | Please Check |
| PLAT213_ALERT_2_C | Atom N4                                          | has ADP max/min Ratio .....       | 3.1 prolat   |
| PLAT214_ALERT_2_C | Atom C99                                         | (Anion/Solvent) ADP max/min Ratio | 4.4 prolat   |
| PLAT220_ALERT_2_C | NonSolvent Resd 1 C                              | Ueq(max)/Ueq(min) Range           | 5.9 Ratio    |
| PLAT220_ALERT_2_C | NonSolvent Resd 1 O                              | Ueq(max)/Ueq(min) Range           | 3.8 Ratio    |
| PLAT222_ALERT_3_C | NonSolvent Resd 1 H                              | Uiso(max)/Uiso(min) Range         | 5.0 Ratio    |
| PLAT241_ALERT_2_C | High 'MainMol'                                   | Ueq as Compared to Neighbors of   | C11 Check    |
| PLAT241_ALERT_2_C | High 'MainMol'                                   | Ueq as Compared to Neighbors of   | C15 Check    |
| PLAT241_ALERT_2_C | High 'MainMol'                                   | Ueq as Compared to Neighbors of   | C59 Check    |
| PLAT241_ALERT_2_C | High 'MainMol'                                   | Ueq as Compared to Neighbors of   | C93 Check    |
| PLAT242_ALERT_2_C | Low 'MainMol'                                    | Ueq as Compared to Neighbors of   | C7 Check     |
| PLAT242_ALERT_2_C | Low 'MainMol'                                    | Ueq as Compared to Neighbors of   | C12 Check    |
| PLAT242_ALERT_2_C | Low 'MainMol'                                    | Ueq as Compared to Neighbors of   | C16 Check    |
| PLAT242_ALERT_2_C | Low 'MainMol'                                    | Ueq as Compared to Neighbors of   | C56 Check    |
| PLAT242_ALERT_2_C | Low 'MainMol'                                    | Ueq as Compared to Neighbors of   | C91 Check    |

|                   |                                             |                                           |      |              |
|-------------------|---------------------------------------------|-------------------------------------------|------|--------------|
| PLAT244_ALERT_4_C | Low                                         | 'Solvent' Ueq as Compared to Neighbors of | N9   | Check        |
| PLAT244_ALERT_4_C | Low                                         | 'Solvent' Ueq as Compared to Neighbors of | C101 | Check        |
| PLAT245_ALERT_2_C | U(iso) H97A                                 | Smaller than U(eq) C98                    | by   | 0.038 Ang**2 |
| PLAT245_ALERT_2_C | U(iso) H97B                                 | Smaller than U(eq) C98                    | by   | 0.038 Ang**2 |
| PLAT260_ALERT_2_C | Large Average Ueq of Residue Including      | O19                                       |      | 0.242 Check  |
| PLAT329_ALERT_4_C | Carbon Atom Hybridisation Unclear for ..... |                                           |      | C60 Check    |
| PLAT341_ALERT_3_C | Low Bond Precision on C-C Bonds .....       |                                           |      | 0.01069 Ang. |

## ● Alert level G

FORMU01\_ALERT\_2\_G There is a discrepancy between the atom counts in the  
     \_chemical\_formula\_sum and the formula from the \_atom\_site\* data.  
     Atom count from \_chemical\_formula\_sum: C101 H101 Cu3 N9 O19  
     Atom count from the \_atom\_site data: C101 H99 Cu3 N9 O19

CELLZ01\_ALERT\_1\_G Difference between formula and atom\_site contents detected.  
 CELLZ01\_ALERT\_1\_G WARNING: H atoms missing from atom site list. Is this intentional?  
     From the CIF: \_cell\_formula\_units\_Z 4  
     From the CIF: \_chemical\_formula\_sum C101 H101 Cu3 N9 O19  
     TEST: Compare cell contents of formula and atom\_site data

| atom | Z*formula | cif sites | diff |
|------|-----------|-----------|------|
| C    | 404.00    | 404.00    | 0.00 |
| H    | 404.00    | 396.00    | 8.00 |
| Cu   | 12.00     | 12.00     | 0.00 |
| N    | 36.00     | 36.00     | 0.00 |
| O    | 76.00     | 76.00     | 0.00 |

|                   |                                                  |                |           |
|-------------------|--------------------------------------------------|----------------|-----------|
| PLAT004_ALERT_5_G | Polymeric Structure Found with Maximum Dimension | 3              | Info      |
| PLAT007_ALERT_5_G | Number of Unrefined Donor-H Atoms .....          | 8              | Report    |
| PLAT199_ALERT_1_G | Reported _cell_measurement_temperature .....     | 293            | Check     |
| PLAT200_ALERT_1_G | Reported _diffrn_ambient_temperature .....       | 293            | Check     |
| PLAT300_ALERT_4_G | Atom Site Occupancy of C19                       | Constrained at | 0.5 Check |
| PLAT300_ALERT_4_G | Atom Site Occupancy of C19'                      | Constrained at | 0.5 Check |
| PLAT300_ALERT_4_G | Atom Site Occupancy of C20                       | Constrained at | 0.5 Check |
| PLAT300_ALERT_4_G | Atom Site Occupancy of C20'                      | Constrained at | 0.5 Check |
| PLAT300_ALERT_4_G | Atom Site Occupancy of C21                       | Constrained at | 0.5 Check |
| PLAT300_ALERT_4_G | Atom Site Occupancy of C21'                      | Constrained at | 0.5 Check |
| PLAT300_ALERT_4_G | Atom Site Occupancy of C60                       | Constrained at | 0.5 Check |
| PLAT300_ALERT_4_G | Atom Site Occupancy of C60'                      | Constrained at | 0.5 Check |
| PLAT300_ALERT_4_G | Atom Site Occupancy of C95                       | Constrained at | 0.5 Check |
| PLAT300_ALERT_4_G | Atom Site Occupancy of C95'                      | Constrained at | 0.5 Check |
| PLAT300_ALERT_4_G | Atom Site Occupancy of C96                       | Constrained at | 0.5 Check |
| PLAT300_ALERT_4_G | Atom Site Occupancy of C96'                      | Constrained at | 0.5 Check |
| PLAT300_ALERT_4_G | Atom Site Occupancy of C97                       | Constrained at | 0.5 Check |
| PLAT300_ALERT_4_G | Atom Site Occupancy of C97'                      | Constrained at | 0.5 Check |
| PLAT300_ALERT_4_G | Atom Site Occupancy of C98                       | Constrained at | 0.5 Check |
| PLAT300_ALERT_4_G | Atom Site Occupancy of C98'                      | Constrained at | 0.5 Check |
| PLAT300_ALERT_4_G | Atom Site Occupancy of H19A                      | Constrained at | 0.5 Check |
| PLAT300_ALERT_4_G | Atom Site Occupancy of H19B                      | Constrained at | 0.5 Check |
| PLAT300_ALERT_4_G | Atom Site Occupancy of H20A                      | Constrained at | 0.5 Check |
| PLAT300_ALERT_4_G | Atom Site Occupancy of H20B                      | Constrained at | 0.5 Check |
| PLAT300_ALERT_4_G | Atom Site Occupancy of H21A                      | Constrained at | 0.5 Check |
| PLAT300_ALERT_4_G | Atom Site Occupancy of H21B                      | Constrained at | 0.5 Check |
| PLAT300_ALERT_4_G | Atom Site Occupancy of H60A                      | Constrained at | 0.5 Check |
| PLAT300_ALERT_4_G | Atom Site Occupancy of H60B                      | Constrained at | 0.5 Check |
| PLAT300_ALERT_4_G | Atom Site Occupancy of H60C                      | Constrained at | 0.5 Check |
| PLAT300_ALERT_4_G | Atom Site Occupancy of H60D                      | Constrained at | 0.5 Check |
| PLAT300_ALERT_4_G | Atom Site Occupancy of H95A                      | Constrained at | 0.5 Check |

|                   |                                                  |                |       |             |
|-------------------|--------------------------------------------------|----------------|-------|-------------|
| PLAT300_ALERT_4_G | Atom Site Occupancy of H95B                      | Constrained at | 0.5   | Check       |
| PLAT300_ALERT_4_G | Atom Site Occupancy of H95C                      | Constrained at | 0.5   | Check       |
| PLAT300_ALERT_4_G | Atom Site Occupancy of H95D                      | Constrained at | 0.5   | Check       |
| PLAT300_ALERT_4_G | Atom Site Occupancy of H96A                      | Constrained at | 0.5   | Check       |
| PLAT300_ALERT_4_G | Atom Site Occupancy of H96B                      | Constrained at | 0.5   | Check       |
| PLAT300_ALERT_4_G | Atom Site Occupancy of H96C                      | Constrained at | 0.5   | Check       |
| PLAT300_ALERT_4_G | Atom Site Occupancy of H96D                      | Constrained at | 0.5   | Check       |
| PLAT300_ALERT_4_G | Atom Site Occupancy of H97A                      | Constrained at | 0.5   | Check       |
| PLAT300_ALERT_4_G | Atom Site Occupancy of H97B                      | Constrained at | 0.5   | Check       |
| PLAT300_ALERT_4_G | Atom Site Occupancy of H97C                      | Constrained at | 0.5   | Check       |
| PLAT300_ALERT_4_G | Atom Site Occupancy of H97D                      | Constrained at | 0.5   | Check       |
| PLAT300_ALERT_4_G | Atom Site Occupancy of H98A                      | Constrained at | 0.5   | Check       |
| PLAT300_ALERT_4_G | Atom Site Occupancy of H98B                      | Constrained at | 0.5   | Check       |
| PLAT300_ALERT_4_G | Atom Site Occupancy of H98C                      | Constrained at | 0.5   | Check       |
| PLAT300_ALERT_4_G | Atom Site Occupancy of H98D                      | Constrained at | 0.5   | Check       |
| PLAT301_ALERT_3_G | Main Residue Disorder .....(Resd 1 )             |                | 6%    | Note        |
| PLAT367_ALERT_2_G | Long? C(sp?)-C(sp?) Bond C58 - C59               |                | 1.52  | Ang.        |
| PLAT380_ALERT_4_G | Incorrectly? Oriented X(sp2)-Methyl Moiety ..... |                | C99   | Check       |
| PLAT380_ALERT_4_G | Incorrectly? Oriented X(sp2)-Methyl Moiety ..... |                | C100  | Check       |
| PLAT410_ALERT_2_G | Short Intra H...H Contact H17B ..H19A            |                | 2.09  | Ang.        |
|                   |                                                  | x,y,z =        | 1_555 | Check       |
| PLAT773_ALERT_2_G | Check long C-C Bond in CIF: C59 --C60            |                | 1.90  | Ang.        |
| PLAT794_ALERT_5_G | Tentative Bond Valency for Cu2 (II)              |                | 2.20  | Info        |
| PLAT794_ALERT_5_G | Tentative Bond Valency for Cu3 (II)              |                | 2.16  | Info        |
| PLAT804_ALERT_5_G | Number of ARU-Code Packing Problem(s) in PLATON  |                | 17    | Info        |
| PLAT850_ALERT_4_G | Check Flack Parameter Exact Value 0.00 with s.u. |                | 0.01  | Check       |
| PLAT883_ALERT_1_G | No Info/Value for _atom_sites_solution_primary   |                |       | Please Do ! |
| PLAT910_ALERT_3_G | Missing # of FCF Reflection(s) Below Theta(Min). |                | 1     | Note        |
| PLAT912_ALERT_4_G | Missing # of FCF Reflections Above STh/L= 0.600  |                | 46    | Note        |
| PLAT915_ALERT_3_G | No Flack x Check Done: Low Friedel Pair Coverage |                | 68    | %           |
| PLAT978_ALERT_2_G | Number C-C Bonds with Positive Residual Density. |                | 2     | Info        |

---

0 **ALERT level A** = Most likely a serious problem - resolve or explain  
 0 **ALERT level B** = A potentially serious problem, consider carefully  
 23 **ALERT level C** = Check. Ensure it is not caused by an omission or oversight  
 64 **ALERT level G** = General information/check it is not something unexpected

7 ALERT type 1 CIF construction/syntax error, inconsistent or missing data  
 21 ALERT type 2 Indicator that the structure model may be wrong or deficient  
 5 ALERT type 3 Indicator that the structure quality may be low  
 49 ALERT type 4 Improvement, methodology, query or suggestion  
 5 ALERT type 5 Informative message, check

---



---

It is advisable to attempt to resolve as many as possible of the alerts in all categories. Often the minor alerts point to easily fixed oversights, errors and omissions in your CIF or refinement strategy, so attention to these fine details can be worthwhile. In order to resolve some of the more serious problems it may be necessary to carry out additional measurements or structure refinements. However, the purpose of your study may justify the reported deviations and the more serious of these should normally be commented upon in the discussion or experimental section of a paper or in the "special\_details" fields of the CIF. checkCIF was carefully designed to identify outliers and unusual parameters, but every test has its limitations and alerts that are not important in a particular case may appear. Conversely, the absence of alerts does not guarantee there are no aspects of the results needing attention. It is up to the individual to critically assess their own results and, if necessary, seek expert advice.

### **Publication of your CIF in IUCr journals**

A basic structural check has been run on your CIF. These basic checks will be run on all CIFs submitted for publication in IUCr journals (*Acta Crystallographica*, *Journal of Applied Crystallography*, *Journal of Synchrotron Radiation*); however, if you intend to submit to *Acta Crystallographica Section C* or *E* or *IUCrData*, you should make sure that full publication checks are run on the final version of your CIF prior to submission.

### **Publication of your CIF in other journals**

Please refer to the *Notes for Authors* of the relevant journal for any special instructions relating to CIF submission.



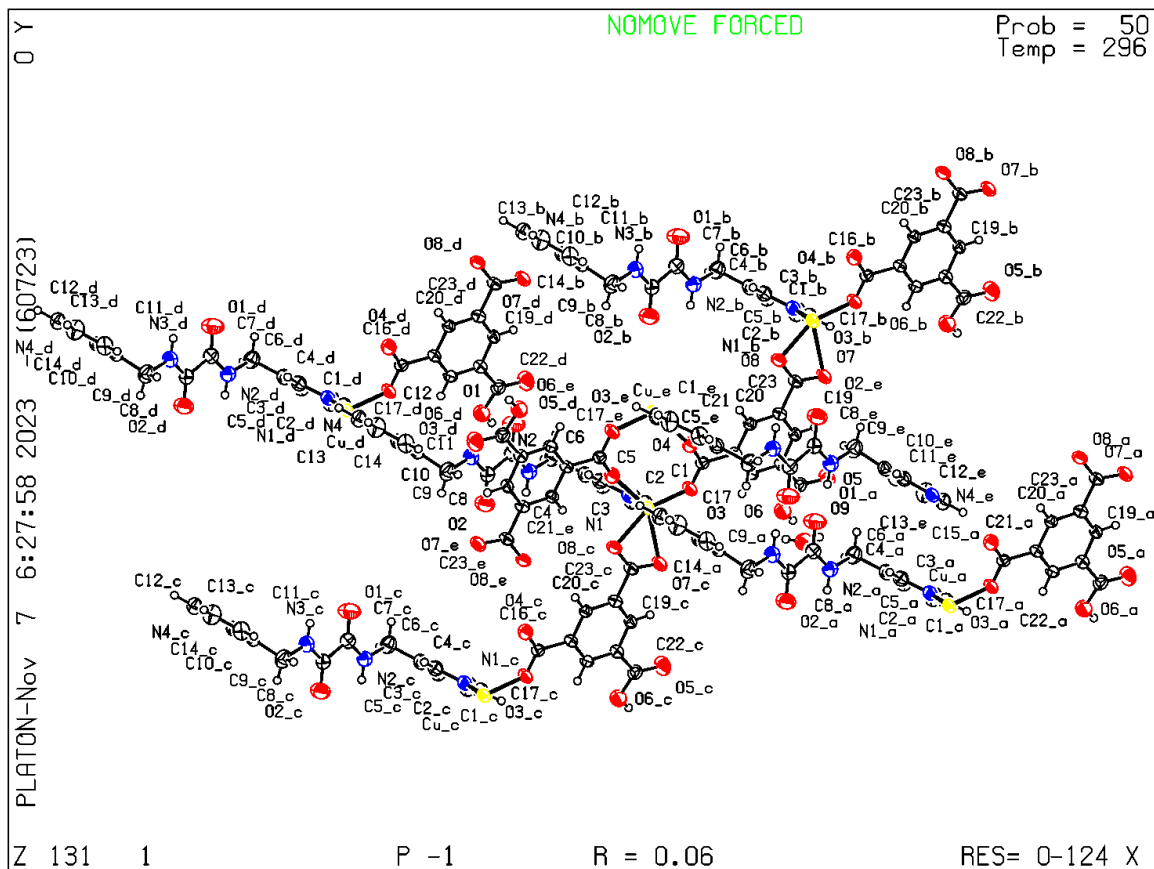

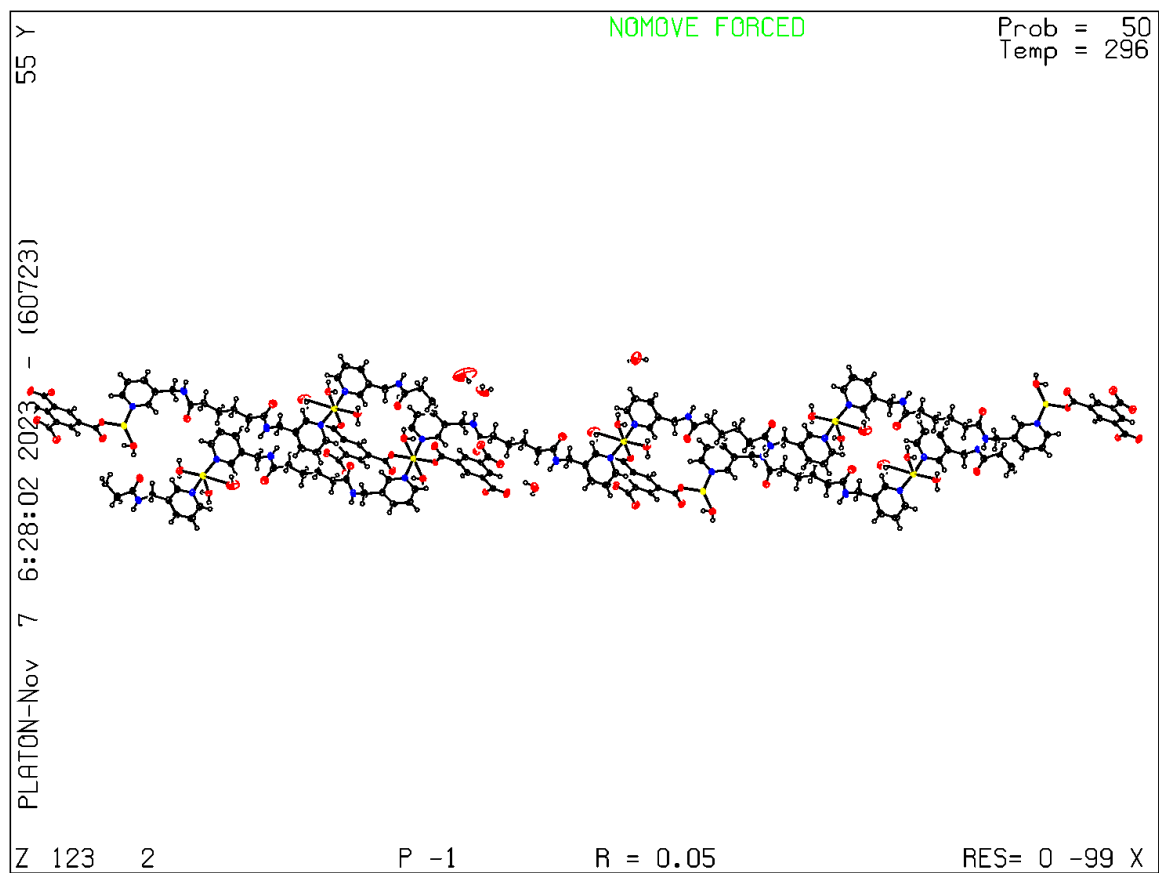

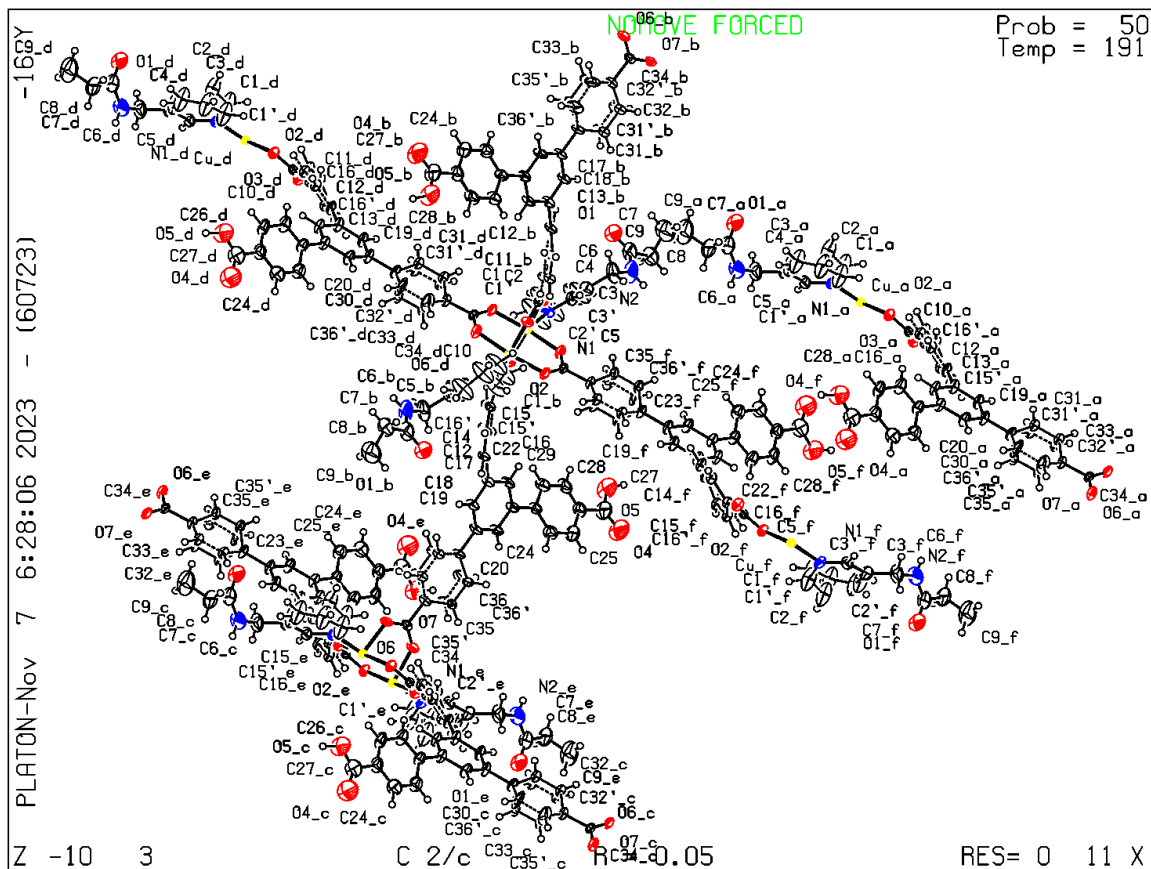

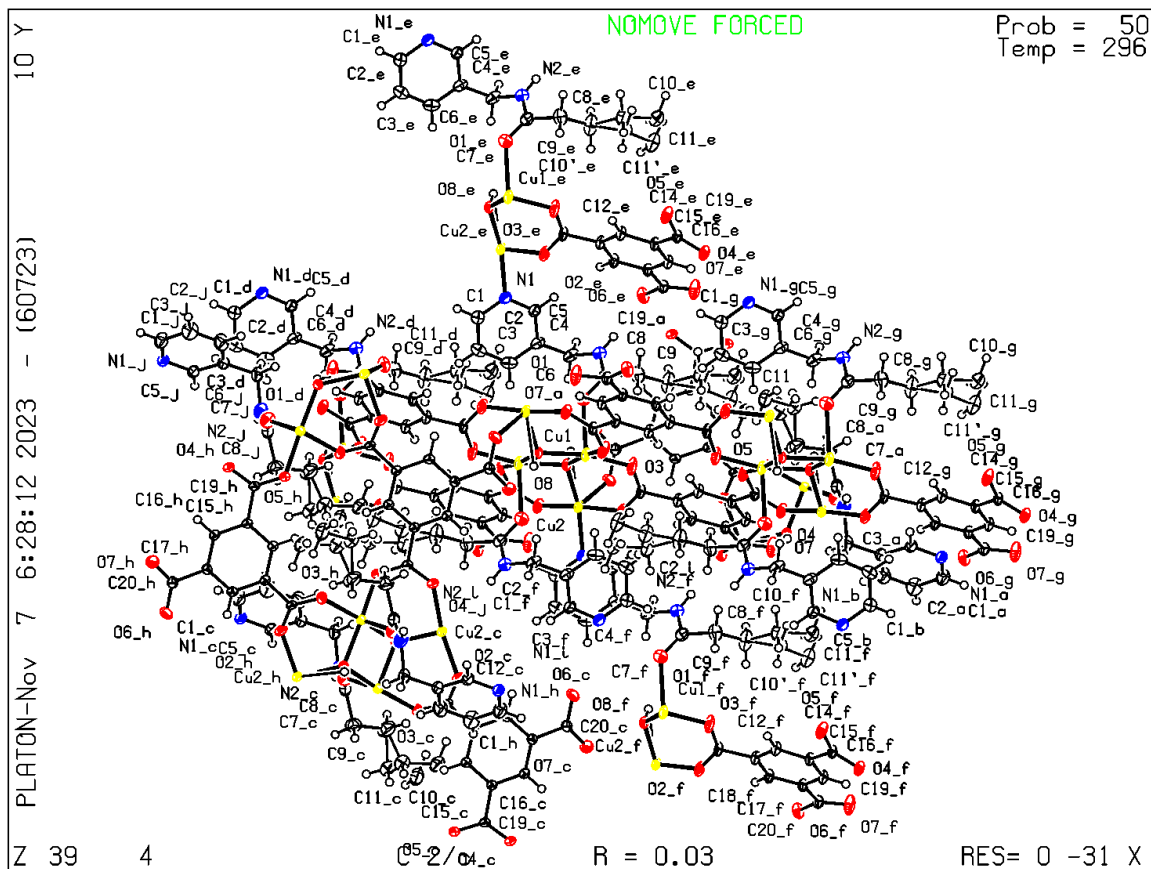

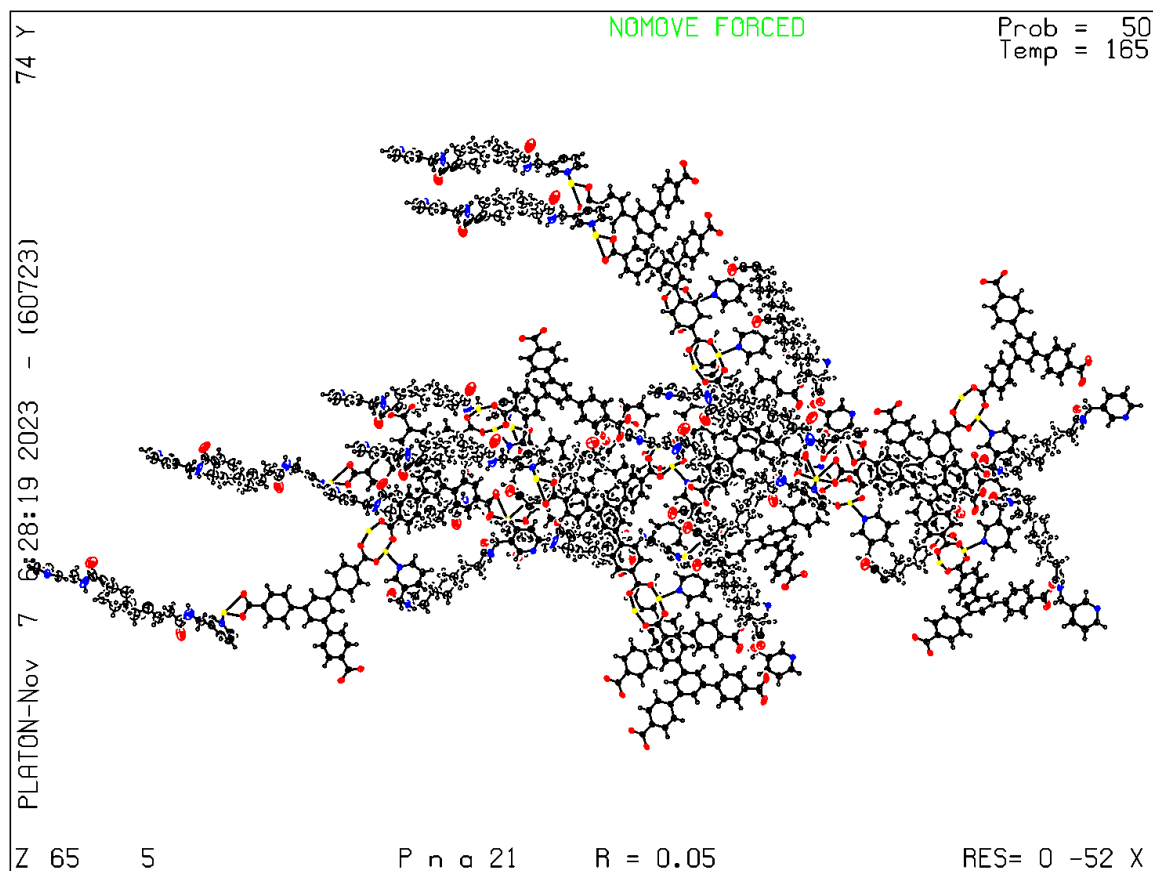

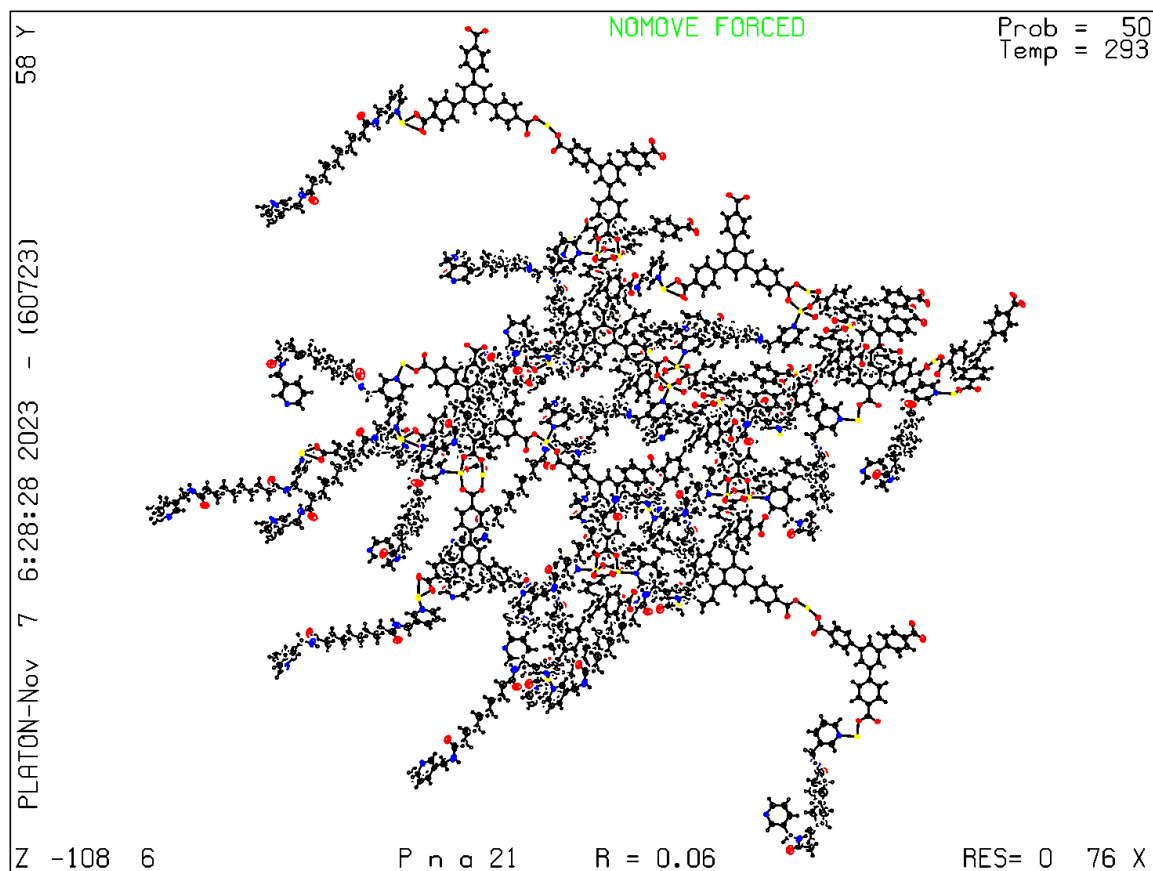

Supplement: Supplementary file 1 [file supplementary]
