# Supplementary material for: Cu(Ⅱ) Coordination Polymers Containing Mixed Ligands with Different Flexibility: Structural Diversity and Iodine Adsorption
Source: Preprints.org preprint supplement (doi:10.20944/preprints202312.0220.v1), 2023-12-05

## **Supplementary materials**

**Shu-Yu Lin,<sup>1</sup> Yi-Lin Shen,<sup>1</sup> Wei-Hao Chen,<sup>1</sup>  
Manivannan Govindaraj<sup>2,\*</sup> and Jhy-Der Chen<sup>1,\*</sup>**

<sup>1</sup> Department of Chemistry, Chung Yuan Christian University, Chung Li, Taoyuan City 320, Taiwan;

<sup>2</sup> Department of Chemistry, Periyar Maniammai Institute of Science & Technology (Deemed to be University), Vallam, Thanjavur, 613 403, Tamil Nadu, India;

\* Correspondence: manivannang@pmu.edu (M.G);  
jdchen@cycu.edu.tw (J.-D.C.); Tel.: +886-3-265-3351  
(J.-D. C.)

**Fig. S1.** The infrared spectrum of complex **1**.

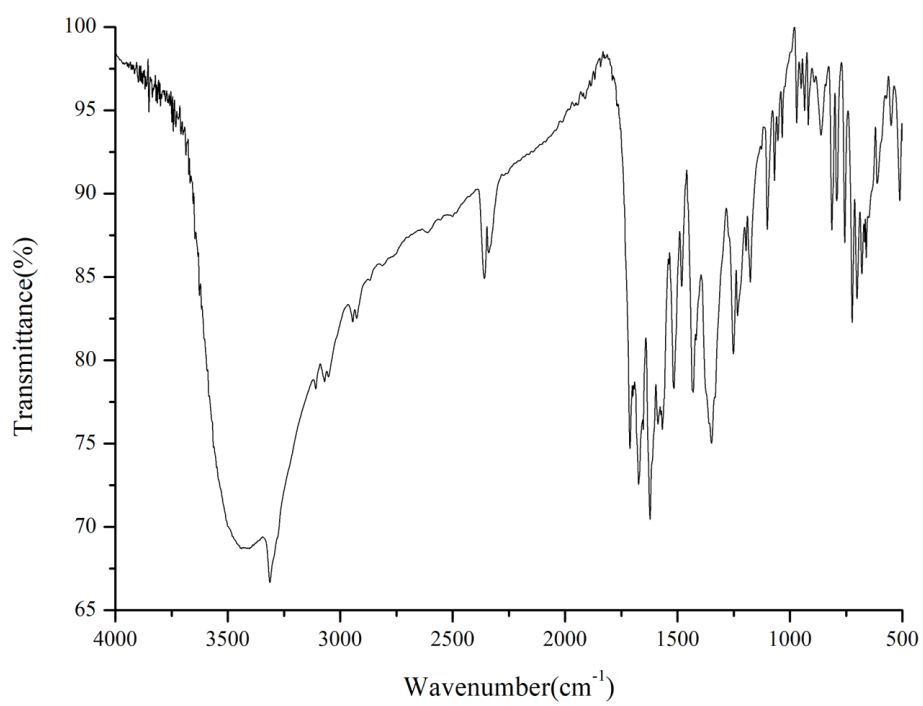

**Fig. S2.** The infrared spectrum of complex **2**.

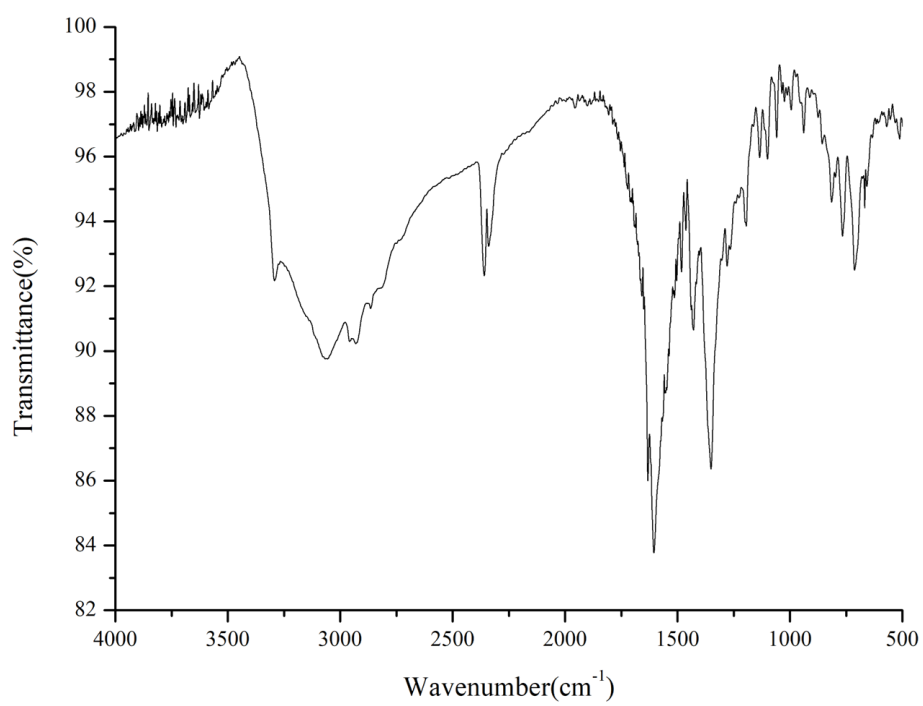

**Fig. S3.** The infrared spectrum of complex **3**.

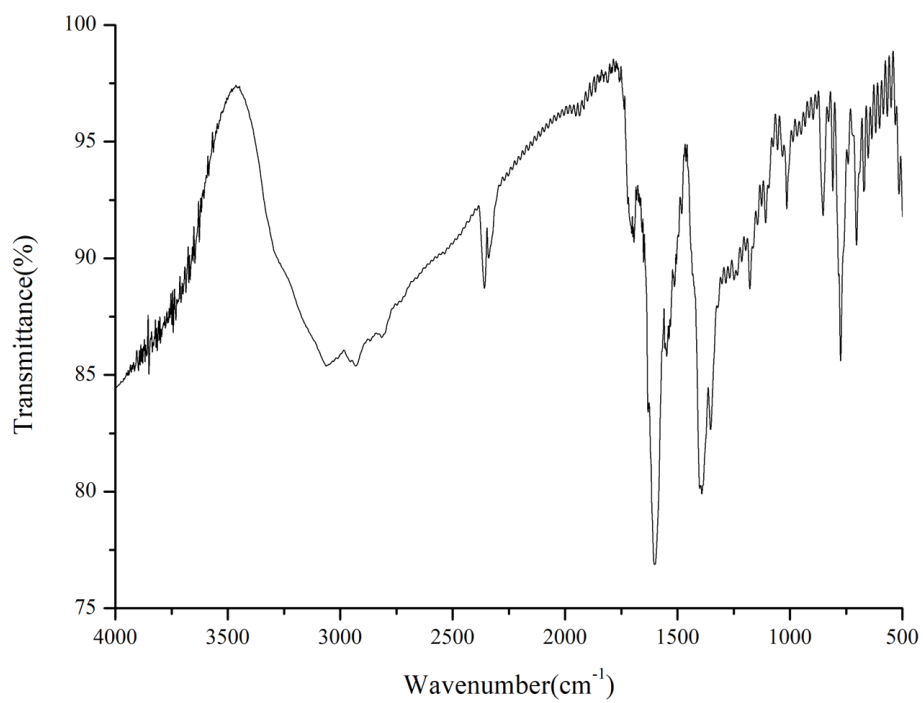

**Fig. S4.** The infrared spectrum of complex 4.

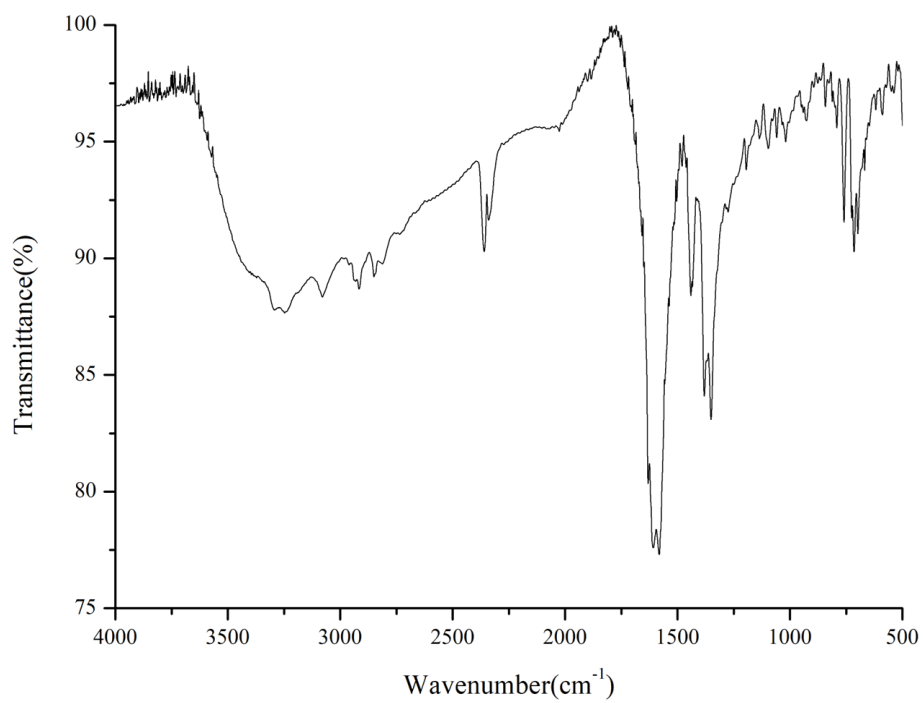

**Fig. S5.** The infrared spectrum of complex **5**.

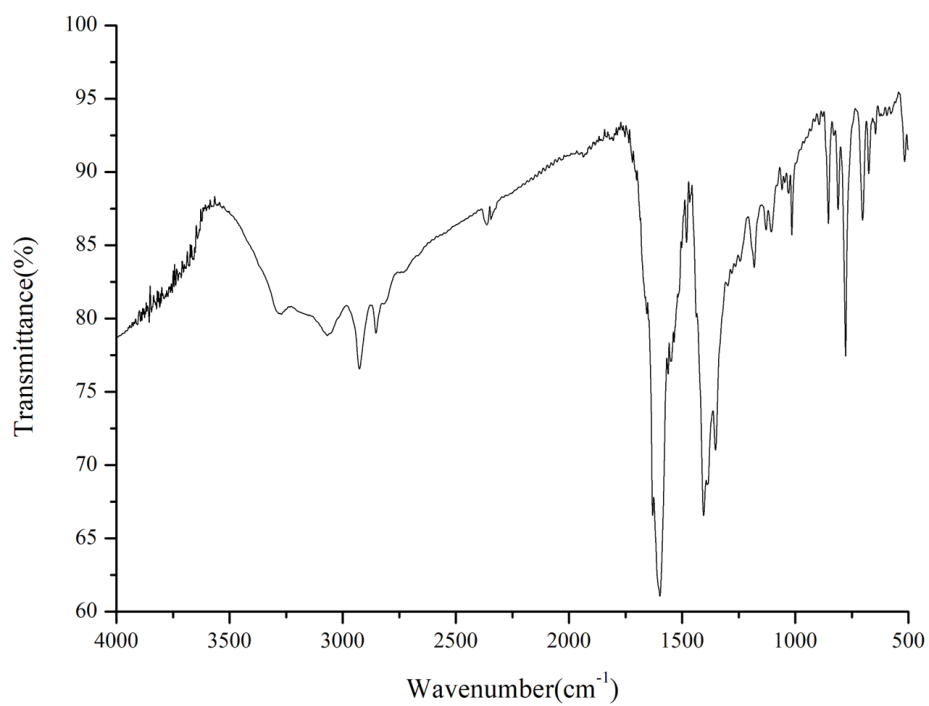

**Fig. S6.** The infrared spectrum of complex **6**.

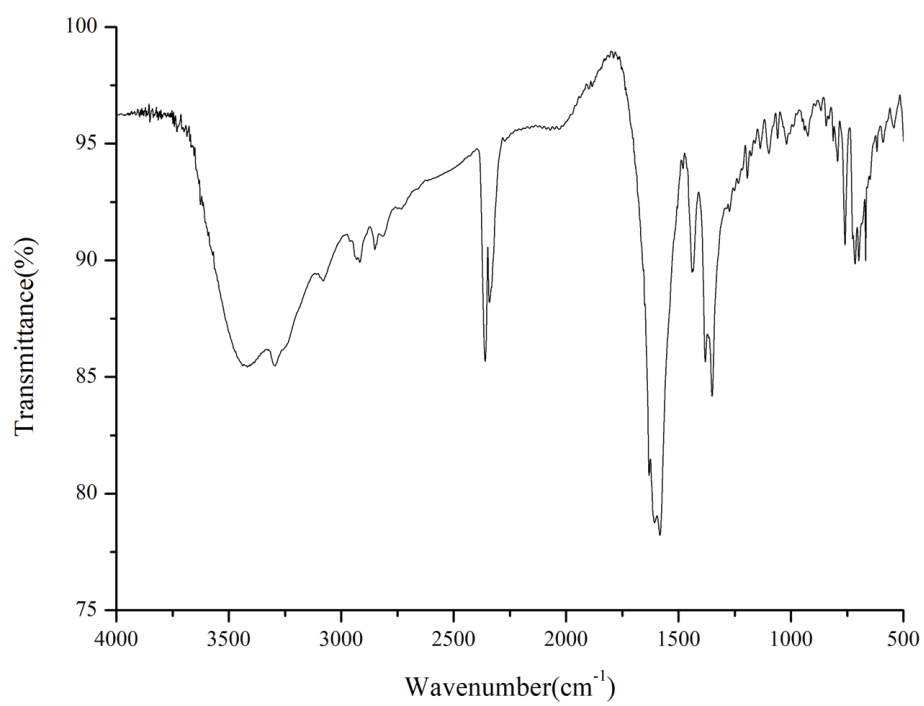

**Fig. S7.** Simulated and experimental PXRD patterns of **1**.

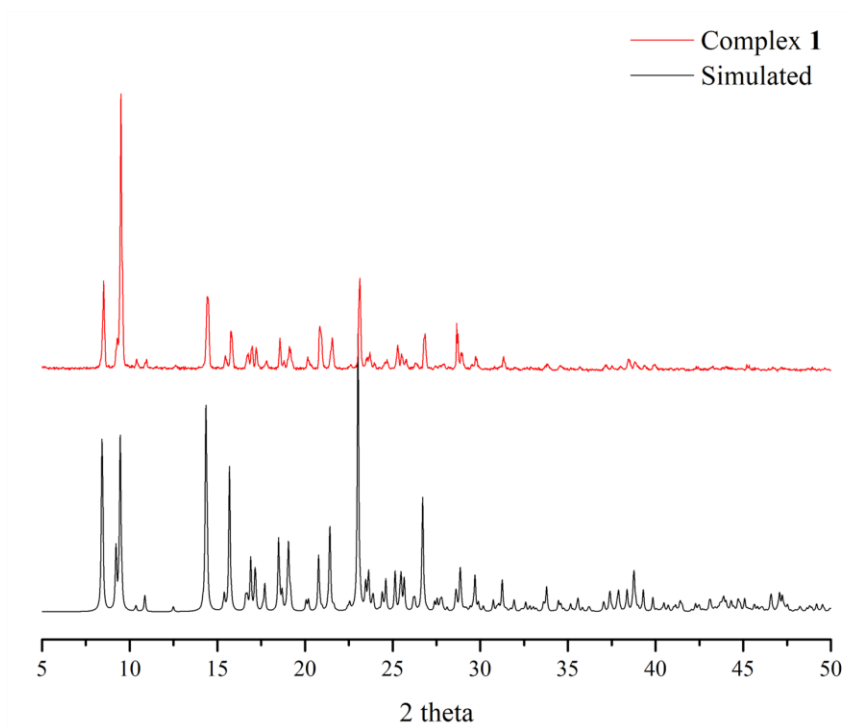



**Fig. S8.** Simulated and experimental PXRD patterns of **2**.

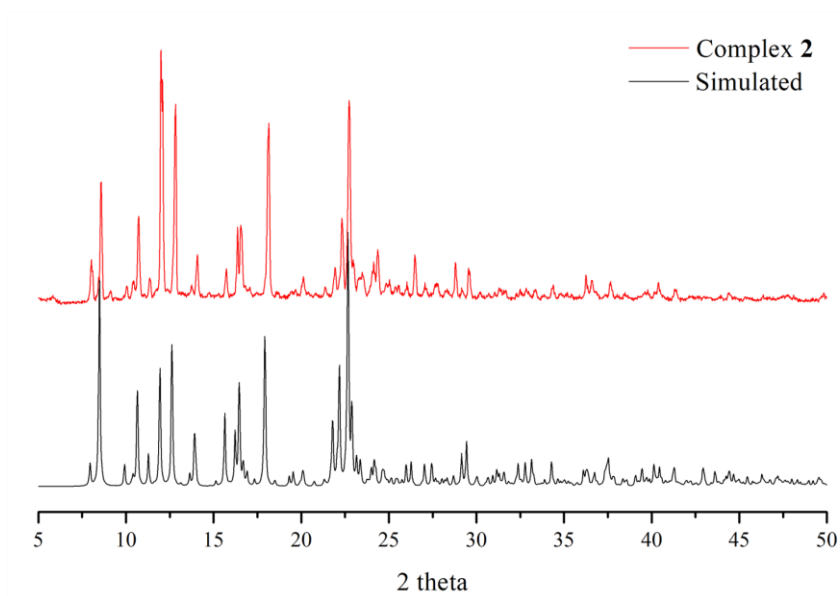

**Fig. S9.** Simulated and experimental PXRD patterns of **3**.

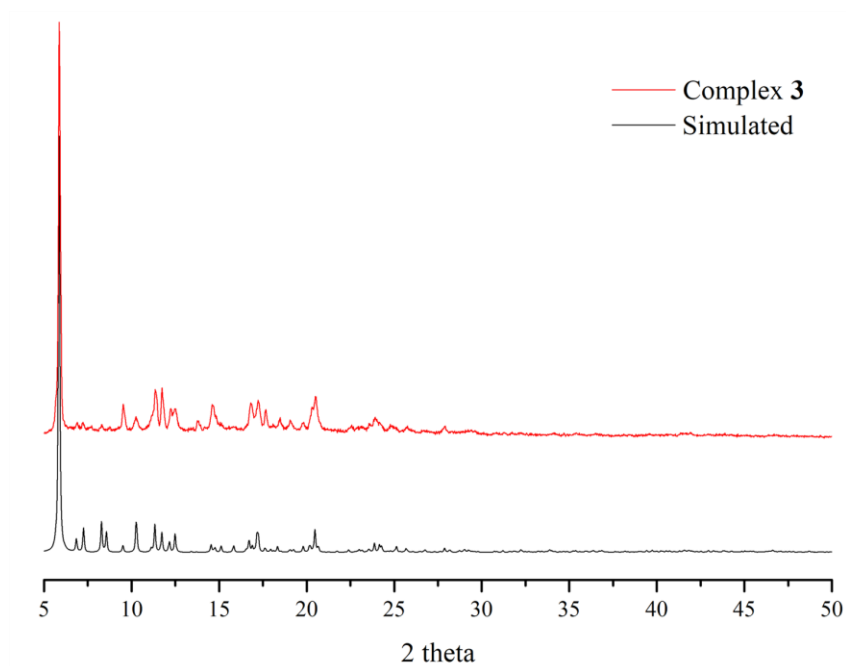

**Fig. S10.** Simulated and experimental PXRD patterns of **4**.

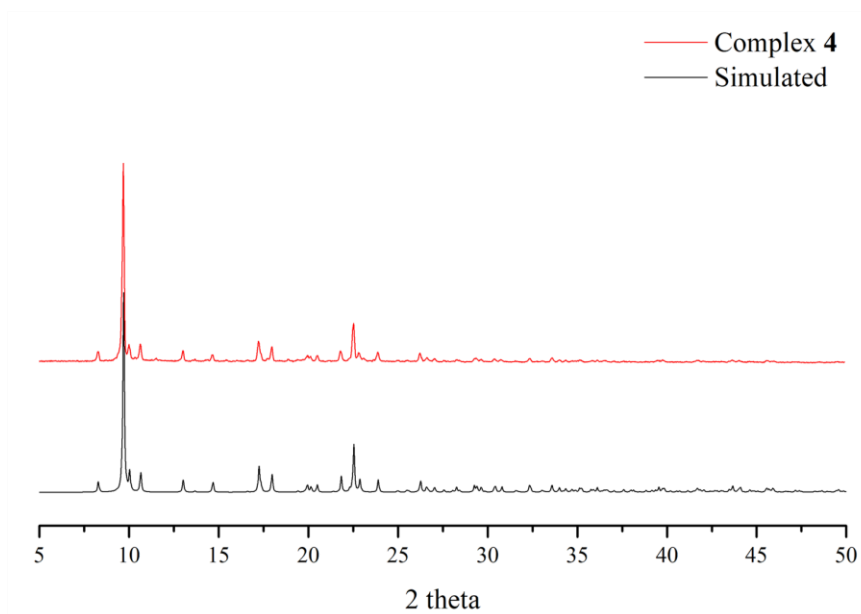

**Fig. S11.** Simulated and experimental PXRD patterns of **5**.

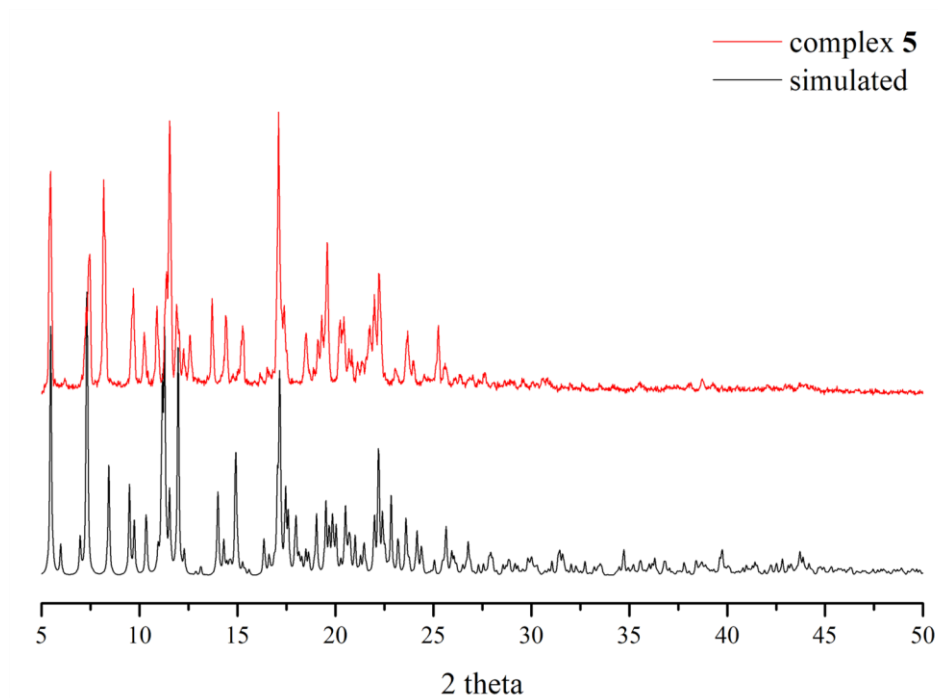

**Fig. S12.** Simulated and experimental PXRD patterns of **6**.

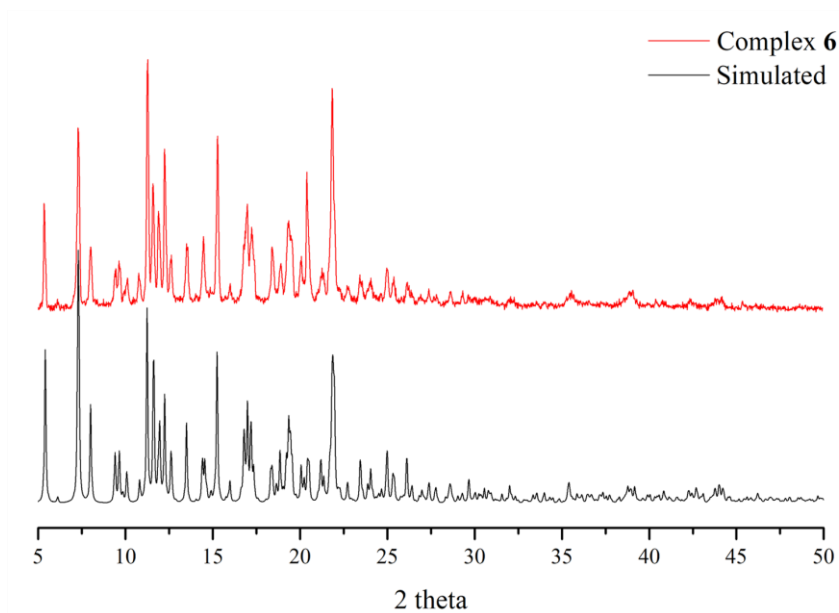

**Fig. S13.** The TGA curve for complex **1**.

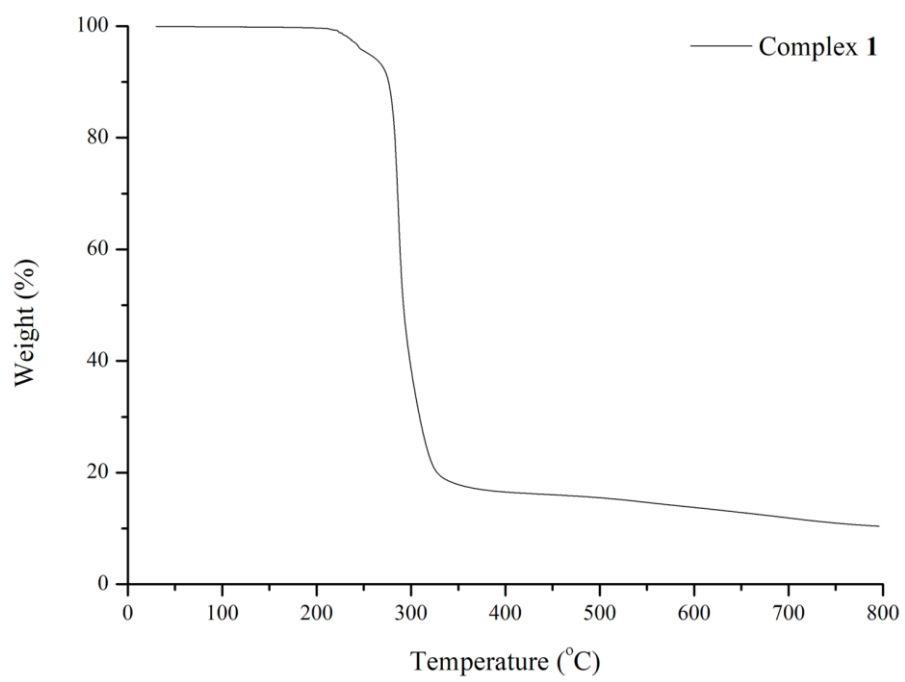

**Fig. S14.** The TGA curve for complex **2**.

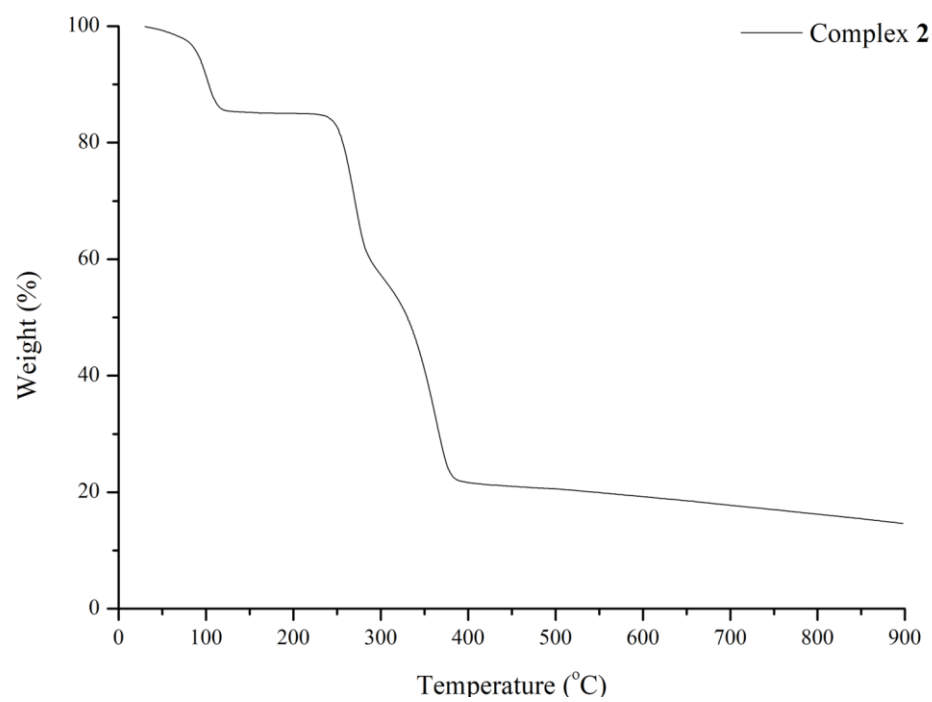

**Fig. S15.** The TGA curve for complex **3**.

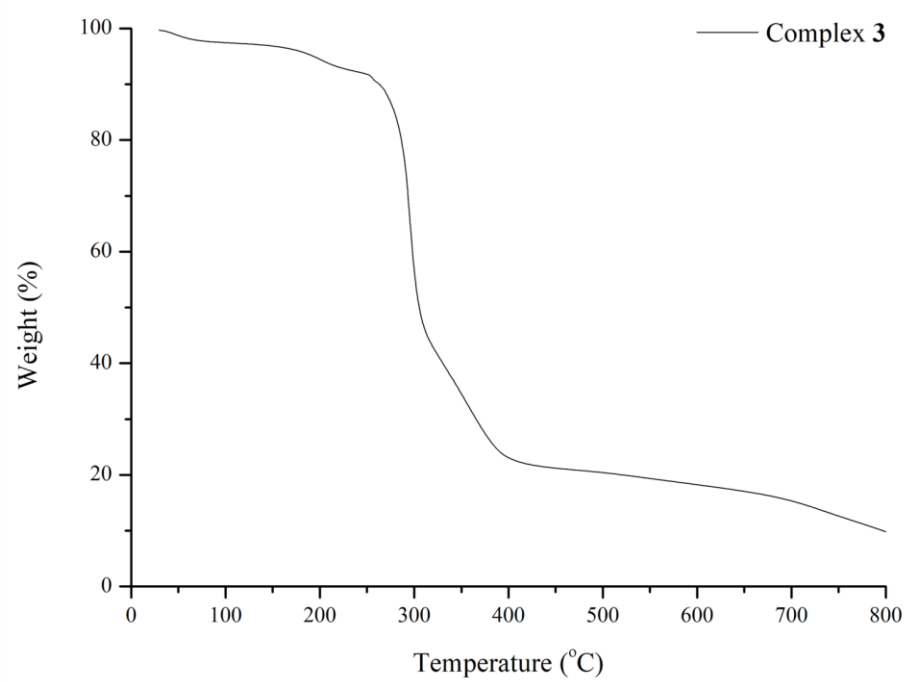



**Fig. S16.** The TGA curve for complex 4.

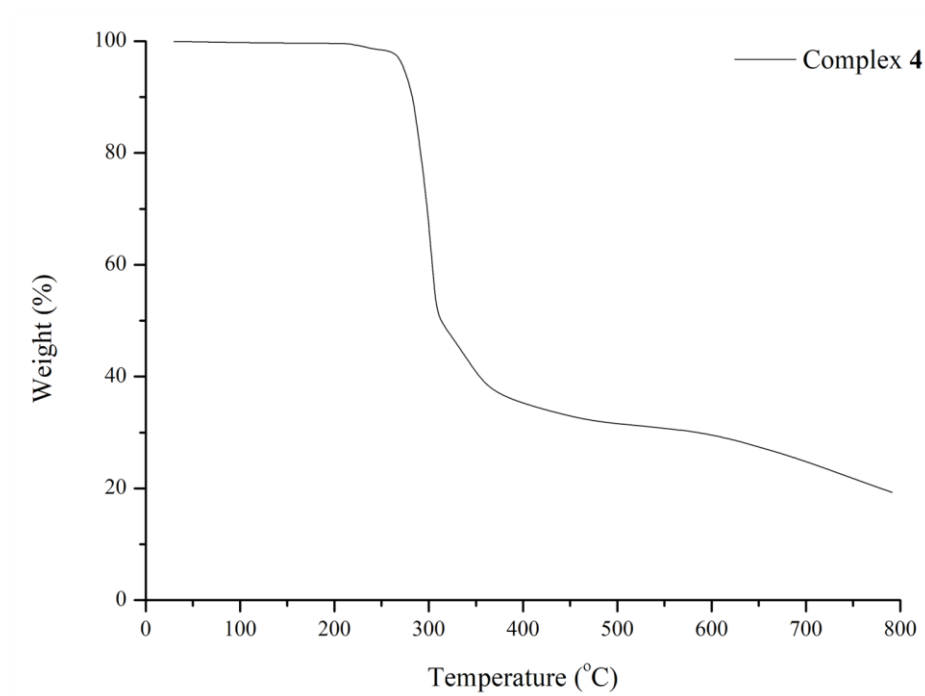

**Fig. S17.** The TGA curve for complex **5**.

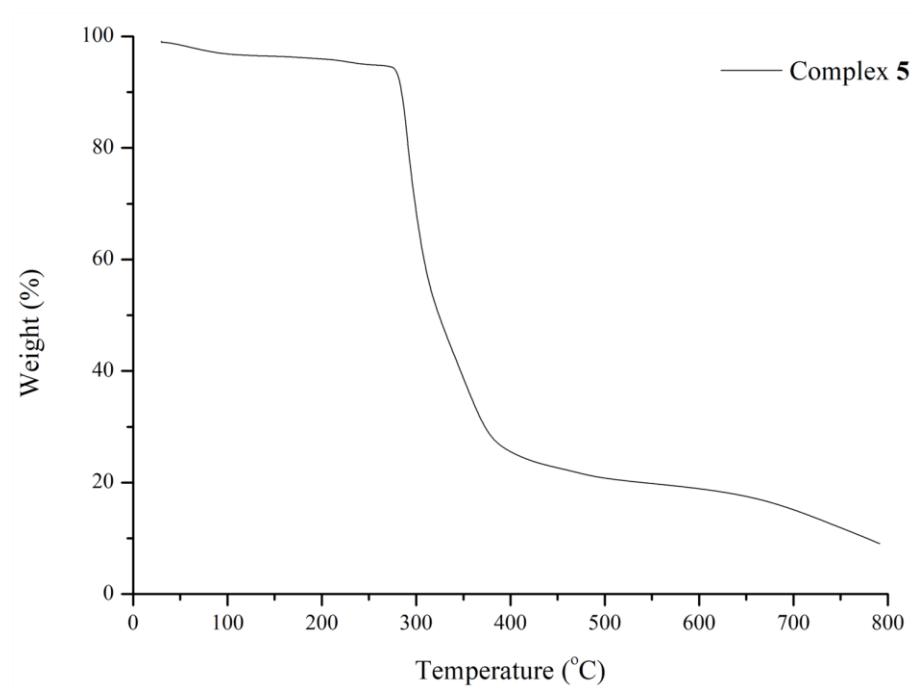

**Fig. S18.** The TGA curve for complex **6**.

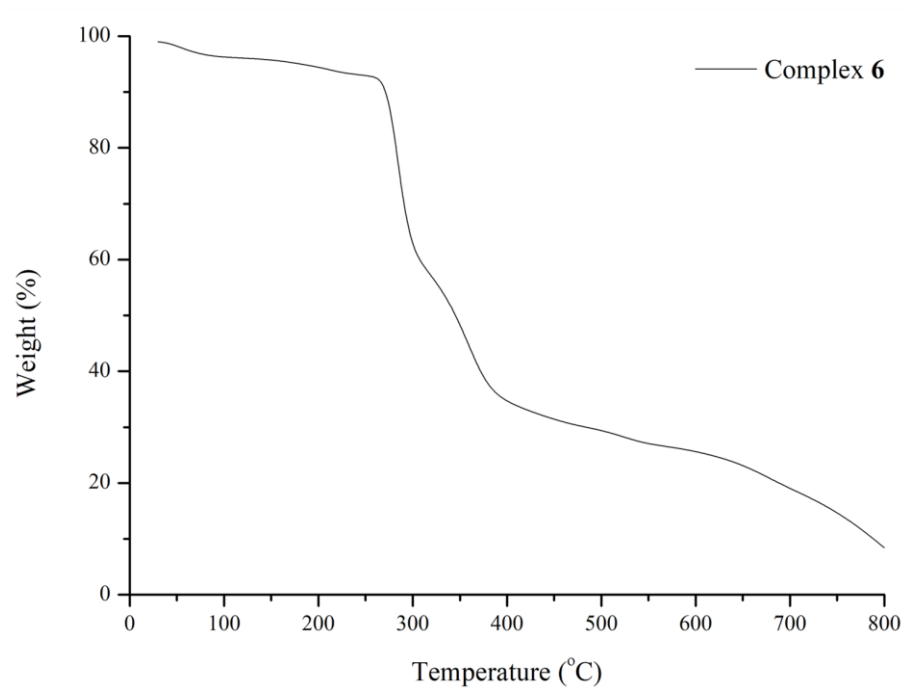

**Fig. S19.** Color change for the iodine-adsorbed samples of **1** at 25 °C. (a) Original **1**, and **1** adsorbed iodine for (b) 30 mins, (c) 60 mins, (d) 120 mins, (e) 180 mins and (f) 360 mins.

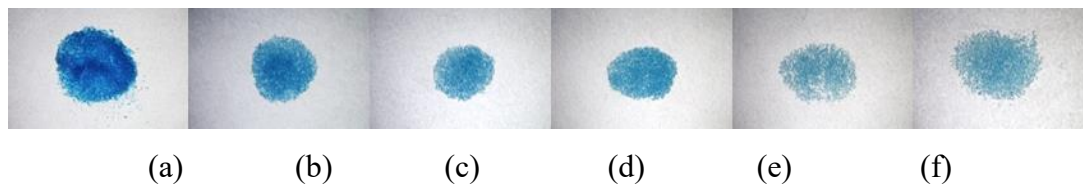

**Fig. S20.** Color change for the iodine-adsorbed samples of **1** at 60 °C. (a) Original **1**, and **1** adsorbed iodine for (b) 30 mins, (c) 60 mins, (d) 120 mins, (e) 180 mins and (f) 360 mins.

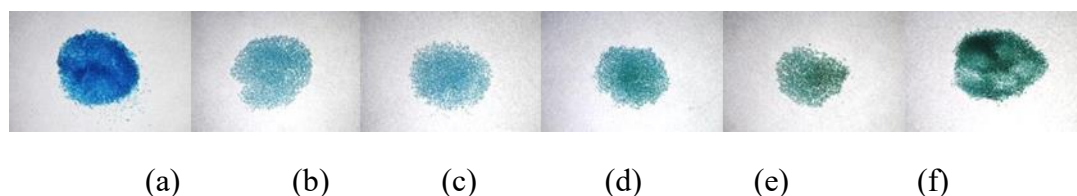

**Fig. S21.** Color change for the iodine-adsorbed samples of **2** at 25 °C. (a) Original **2**, and **2** adsorbed iodine for (b) 30 mins, (c) 60 mins, (d) 120 mins, (e) 180 mins and (f) 360 mins.

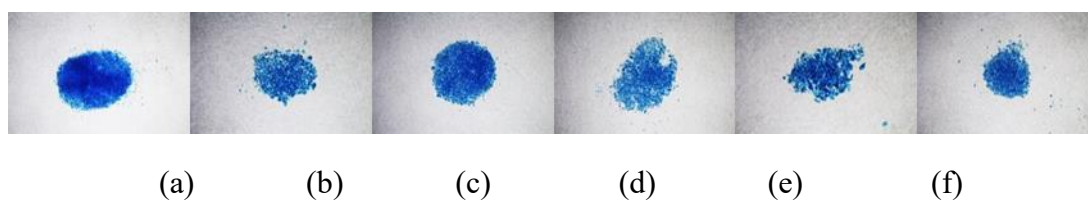

**Fig. S22.** Color change for the iodine-adsorbed samples of **2** at 60 °C. (a) Original **2**, and **2** adsorbed iodine for (b) 30 mins, (c) 60 mins, (d) 120 mins, (e) 180 mins and (f) 360 mins.

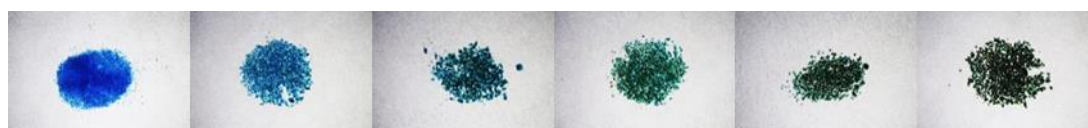

**Fig. S23.** Color change for the iodine-adsorbed samples of **3** at 25 °C. (a) Original **3**, and **3** adsorbed iodine for (b) 30 mins, (c) 60 mins, (d) 120 mins, (e) 180 mins and (f) 360 mins.

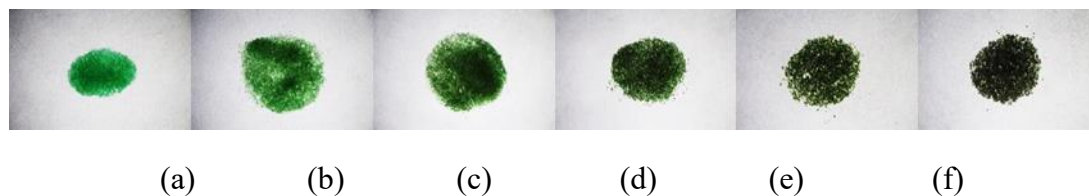

**Fig. S24.** Color change for the iodine-adsorbed samples of **3** at 60 °C. (a) Original **3**, and **3** adsorbed iodine for (b) 30 mins, (c) 60 mins, (d) 120 mins, (e) 180 mins and (f) 360 mins.

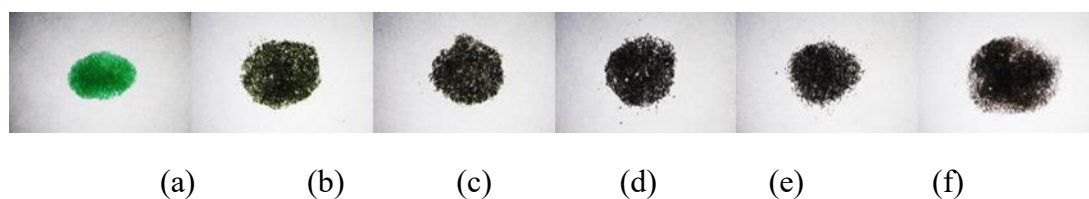

**Fig. S25.** Color change for the iodine-adsorbed samples of **4** at 25 °C. (a) Original **4**, and **4** adsorbed iodine for (b) 30 mins, (c) 60 mins, (d) 120 mins, (e) 180 mins and (f) 360 mins.

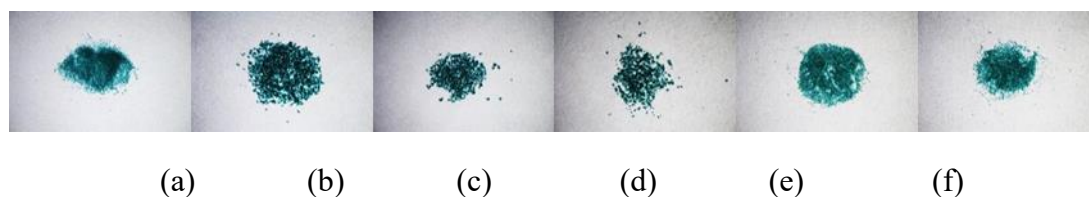

**Fig. S26.** Color change for the iodine-adsorbed samples of **4** at 60 °C. (a) Original **4**, and **4** adsorbed iodine for (b) 30 mins, (c) 60 mins, (d) 120 mins, (e) 180 mins and (f) 360 mins.

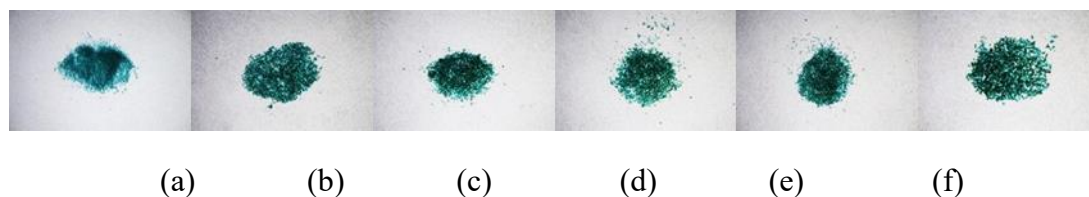

**Fig. S27.** Color change for the iodine-adsorbed samples of **5** at 25 °C. (a) Original **5**, and **5** adsorbed iodine for (b) 30 mins, (c) 60 mins, (d) 120 mins, (e) 180 mins and (f) 360 mins.

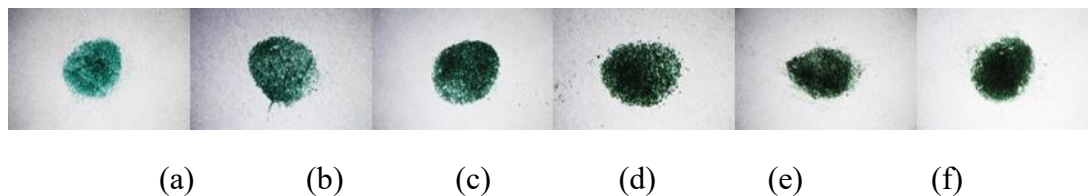

**Fig. S28.** Color change for the iodine-adsorbed samples of **5** at 60 °C. (a) Original **5**, and **5** adsorbed iodine for (b) 30 mins, (c) 60 mins, (d) 120 mins, (e) 180 mins and (f) 360 mins.

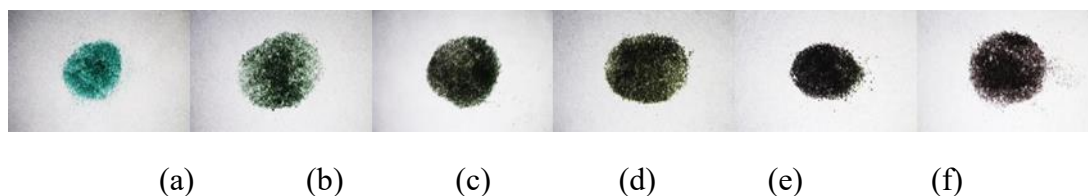

**Fig. S29.** Color change for the iodine-adsorbed samples of **6** at 25 °C. (a) Original **6**, and **6** adsorbed iodine for (b) 30 mins, (c) 60 mins, (d) 120 mins, (e) 180 mins and (f) 360 mins.

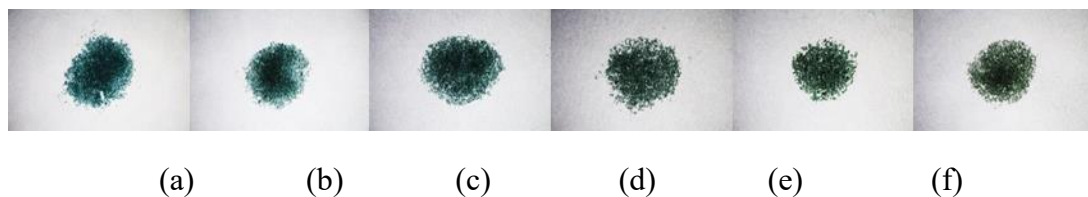

**Fig. S30.** Color change for the iodine-adsorbed samples of **6** at 60 °C. (a) Original **6**, and **6** adsorbed iodine for (b) 30 mins, (c) 60 mins, (d) 120 mins, (e) 180 mins and (f) 360 mins.

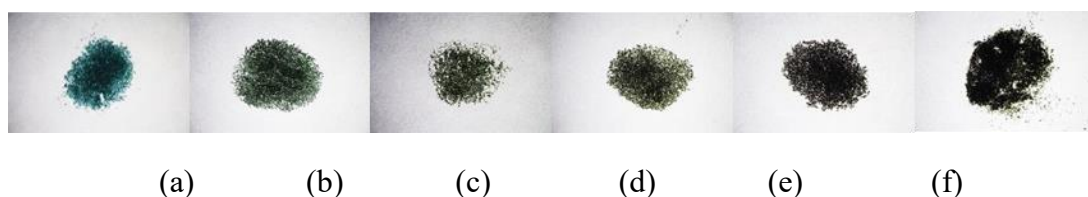

**Table S1.** Iodine adsorption for complex **1** at 25 °C.

| adsorption<br>times<br>(mins) | times | initial<br>weight<br>(mg) | final<br>weight<br>(mg) | iodine<br>content<br>(mg) | adsorbability<br>(mg g <sup>-1</sup> ) | average<br>(mg g <sup>-1</sup> ) |
|-------------------------------|-------|---------------------------|-------------------------|---------------------------|----------------------------------------|----------------------------------|
| 30                            | 1     | 10.0                      | 10.0                    | 0.0                       | 0.0                                    | 0.0                              |
|                               | 2     | 10.0                      | 10.0                    | 0.0                       | 0.0                                    |                                  |
|                               | 3     | 10.0                      | 10.0                    | 0.0                       | 0.0                                    |                                  |
| 60                            | 1     | 10.0                      | 10.1                    | 0.1                       | 10.0                                   | 3.3                              |
|                               | 2     | 10.0                      | 10.0                    | 0.0                       | 0.0                                    |                                  |
|                               | 3     | 10.0                      | 10.0                    | 0.0                       | 0.0                                    |                                  |
| 120                           | 1     | 10.0                      | 10.1                    | 0.1                       | 10.0                                   | 6.7                              |
|                               | 2     | 10.0                      | 10.1                    | 0.1                       | 10.0                                   |                                  |
|                               | 3     | 10.0                      | 10.0                    | 0.0                       | 0.0                                    |                                  |
| 180                           | 1     | 10.0                      | 10.2                    | 0.2                       | 20.0                                   | 13.3                             |
|                               | 2     | 10.0                      | 10.1                    | 0.1                       | 10.0                                   |                                  |
|                               | 3     | 10.0                      | 10.1                    | 0.1                       | 10.0                                   |                                  |
| 360                           | 1     | 10.0                      | 10.2                    | 0.2                       | 20.0                                   | 13.3                             |
|                               | 2     | 10.0                      | 10.1                    | 0.1                       | 10.0                                   |                                  |
|                               | 3     | 10.0                      | 10.1                    | 0.1                       | 10.0                                   |                                  |

**Table S2.** Iodine adsorption for complex **1** at 60 °C.

| adsorption times (mins) | times | initial weight (mg) | final weight (mg) | iodine content (mg) | adsorbability (mg g <sup>-1</sup> ) | average (mg g <sup>-1</sup> ) |
|-------------------------|-------|---------------------|-------------------|---------------------|-------------------------------------|-------------------------------|
| 30                      | 1     | 10.0                | 10.0              | 0.0                 | 0.0                                 | 0.0                           |
|                         | 2     | 10.0                | 10.0              | 0.0                 | 0.0                                 |                               |
|                         | 3     | 10.0                | 10.0              | 0.0                 | 0.0                                 |                               |
| 60                      | 1     | 10.0                | 10.1              | 0.1                 | 10.0                                | 10.0                          |
|                         | 2     | 10.0                | 10.1              | 0.1                 | 10.0                                |                               |
|                         | 3     | 10.0                | 10.1              | 0.1                 | 10.0                                |                               |
| 120                     | 1     | 10.0                | 10.2              | 0.2                 | 20.0                                | 13.3                          |
|                         | 2     | 10.0                | 10.1              | 0.1                 | 10.0                                |                               |
|                         | 3     | 10.0                | 10.1              | 0.1                 | 10.0                                |                               |
| 180                     | 1     | 10.0                | 10.2              | 0.2                 | 20.0                                | 16.7                          |
|                         | 2     | 10.0                | 10.1              | 0.1                 | 10.0                                |                               |
|                         | 3     | 10.0                | 10.2              | 0.2                 | 20.0                                |                               |
| 360                     | 1     | 10.0                | 10.2              | 0.2                 | 20.0                                | 20.0                          |
|                         | 2     | 10.0                | 10.3              | 0.3                 | 30.0                                |                               |
|                         | 3     | 10.0                | 10.1              | 0.1                 | 10.0                                |                               |

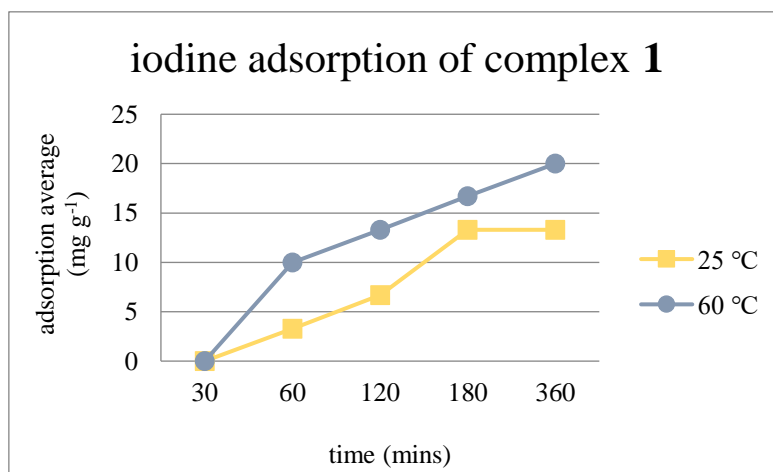



**Table S3.** Iodine adsorption for complex **2** at 25 °C.

| adsorption<br>times<br>(mins) | times | initial<br>weight<br>(mg) | final<br>weight<br>(mg) | iodine<br>content<br>(mg) | adsorbability<br>(mg g <sup>-1</sup> ) | average<br>(mg g <sup>-1</sup> ) |
|-------------------------------|-------|---------------------------|-------------------------|---------------------------|----------------------------------------|----------------------------------|
| 30                            | 1     | 10.0                      | 10.1                    | 0.1                       | 10.0                                   | 3.3                              |
|                               | 2     | 10.0                      | 10.0                    | 0.0                       | 0.0                                    |                                  |
|                               | 3     | 10.0                      | 10.0                    | 0.0                       | 0.0                                    |                                  |
| 60                            | 1     | 10.0                      | 10.1                    | 0.1                       | 10.0                                   | 10.0                             |
|                               | 2     | 10.0                      | 10.1                    | 0.1                       | 10.0                                   |                                  |
|                               | 3     | 10.0                      | 10.1                    | 0.1                       | 10.0                                   |                                  |
| 120                           | 1     | 10.0                      | 10.1                    | 0.1                       | 10.0                                   | 13.3                             |
|                               | 2     | 10.0                      | 10.1                    | 0.1                       | 10.0                                   |                                  |
|                               | 3     | 10.0                      | 10.2                    | 0.2                       | 20.0                                   |                                  |
| 180                           | 1     | 10.0                      | 10.1                    | 0.1                       | 10.0                                   | 13.3                             |
|                               | 2     | 10.0                      | 10.2                    | 0.2                       | 20.0                                   |                                  |
|                               | 3     | 10.0                      | 10.1                    | 0.1                       | 10.0                                   |                                  |
| 360                           | 1     | 10.0                      | 10.4                    | 0.4                       | 40.0                                   | 33.3                             |
|                               | 2     | 10.0                      | 10.3                    | 0.3                       | 30.0                                   |                                  |
|                               | 3     | 10.0                      | 10.3                    | 0.3                       | 30.0                                   |                                  |

**Table S4.** Iodine adsorption for complex **2** at 60 °C.

| adsorption times (mins) | times | initial weight (mg) | final weight (mg) | iodine content (mg) | adsorbability (mg g <sup>-1</sup> ) | average (mg g <sup>-1</sup> ) |
|-------------------------|-------|---------------------|-------------------|---------------------|-------------------------------------|-------------------------------|
| 30                      | 1     | 10.0                | 10.2              | 0.2                 | 20.0                                | 16.7                          |
|                         | 2     | 10.0                | 10.1              | 0.1                 | 10.0                                |                               |
|                         | 3     | 10.0                | 10.2              | 0.2                 | 20.0                                |                               |
| 60                      | 1     | 10.0                | 10.2              | 0.2                 | 20.0                                | 20.0                          |
|                         | 2     | 10.0                | 10.3              | 0.3                 | 30.0                                |                               |
|                         | 3     | 10.0                | 10.1              | 0.1                 | 10.0                                |                               |
| 120                     | 1     | 10.0                | 10.2              | 0.2                 | 20.0                                | 30.0                          |
|                         | 2     | 10.0                | 10.4              | 0.4                 | 40.0                                |                               |
|                         | 3     | 10.0                | 10.3              | 0.3                 | 30.0                                |                               |
| 180                     | 1     | 10.0                | 10.4              | 0.4                 | 40.0                                | 43.3                          |
|                         | 2     | 10.0                | 10.5              | 0.5                 | 50.0                                |                               |
|                         | 3     | 10.0                | 10.4              | 0.4                 | 40.0                                |                               |
| 360                     | 1     | 10.0                | 10.7              | 0.7                 | 70.0                                | 70.0                          |
|                         | 2     | 10.0                | 10.8              | 0.8                 | 80.0                                |                               |
|                         | 3     | 10.0                | 10.6              | 0.6                 | 60.0                                |                               |

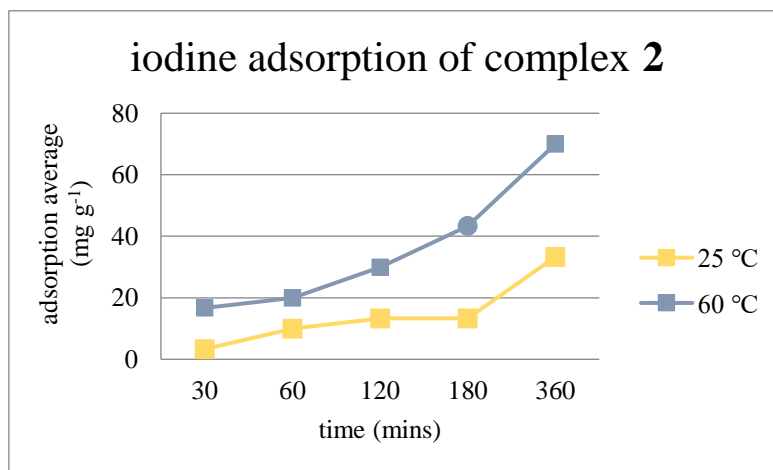

**Table S5.** Iodine adsorption for complex **3** at 25 °C.

| adsorption<br>times<br>(mins) | times | initial<br>weight<br>(mg) | final<br>weight<br>(mg) | iodine<br>content<br>(mg) | adsorbability<br>(mg g <sup>-1</sup> ) | average<br>(mg g <sup>-1</sup> ) |
|-------------------------------|-------|---------------------------|-------------------------|---------------------------|----------------------------------------|----------------------------------|
| 30                            | 1     | 10.0                      | 10.2                    | 0.2                       | 20.0                                   | 13.3                             |
|                               | 2     | 10.0                      | 10.1                    | 0.1                       | 10.0                                   |                                  |
|                               | 3     | 10.0                      | 10.1                    | 0.1                       | 10.0                                   |                                  |
| 60                            | 1     | 10.0                      | 10.2                    | 0.2                       | 20.0                                   | 13.3                             |
|                               | 2     | 10.0                      | 10.1                    | 0.1                       | 10.0                                   |                                  |
|                               | 3     | 10.0                      | 10.1                    | 0.1                       | 10.0                                   |                                  |
| 120                           | 1     | 10.0                      | 10.3                    | 0.3                       | 30.0                                   | 30.0                             |
|                               | 2     | 10.0                      | 10.2                    | 0.2                       | 20.0                                   |                                  |
|                               | 3     | 10.0                      | 10.4                    | 0.4                       | 40.0                                   |                                  |
| 180                           | 1     | 10.0                      | 10.3                    | 0.3                       | 30.0                                   | 30.0                             |
|                               | 2     | 10.0                      | 10.3                    | 0.3                       | 30.0                                   |                                  |
|                               | 3     | 10.0                      | 10.3                    | 0.3                       | 30.0                                   |                                  |
| 360                           | 1     | 10.0                      | 10.5                    | 0.5                       | 50.0                                   | 46.7                             |
|                               | 2     | 10.0                      | 10.4                    | 0.4                       | 40.0                                   |                                  |
|                               | 3     | 10.0                      | 10.5                    | 0.5                       | 50.0                                   |                                  |

**Table S6.** Iodine adsorption for complex **3** at 60 °C.

| adsorption times (mins) | times | initial weight (mg) | final weight (mg) | iodine content (mg) | adsorbability (mg g <sup>-1</sup> ) | average (mg g <sup>-1</sup> ) |
|-------------------------|-------|---------------------|-------------------|---------------------|-------------------------------------|-------------------------------|
| 30                      | 1     | 10.0                | 10.1              | 0.1                 | 10.0                                | 26.7                          |
|                         | 2     | 10.0                | 10.2              | 0.2                 | 20.0                                |                               |
|                         | 3     | 10.0                | 10.5              | 0.5                 | 50.0                                |                               |
| 60                      | 1     | 10.0                | 10.2              | 0.2                 | 20.0                                | 36.7                          |
|                         | 2     | 10.0                | 10.3              | 0.3                 | 30.0                                |                               |
|                         | 3     | 10.0                | 10.6              | 0.6                 | 60.0                                |                               |
| 120                     | 1     | 10.0                | 11.3.             | 1.3                 | 130.0                               | 93.3                          |
|                         | 2     | 10.0                | 10.8              | 0.8                 | 80.0                                |                               |
|                         | 3     | 10.0                | 10.7              | 0.7                 | 70.0                                |                               |
| 180                     | 1     | 10.0                | 11.3              | 1.3                 | 130.0                               | 116.7                         |
|                         | 2     | 10.0                | 11.0              | 1.0                 | 100.0                               |                               |
|                         | 3     | 10.0                | 11.2              | 1.2                 | 120.0                               |                               |
| 360                     | 1     | 10.0                | 11.5              | 1.5                 | 150.0                               | 156.7                         |
|                         | 2     | 10.0                | 11.5              | 1.5                 | 150.0                               |                               |
|                         | 3     | 10.0                | 11.7              | 1.7                 | 170.0                               |                               |

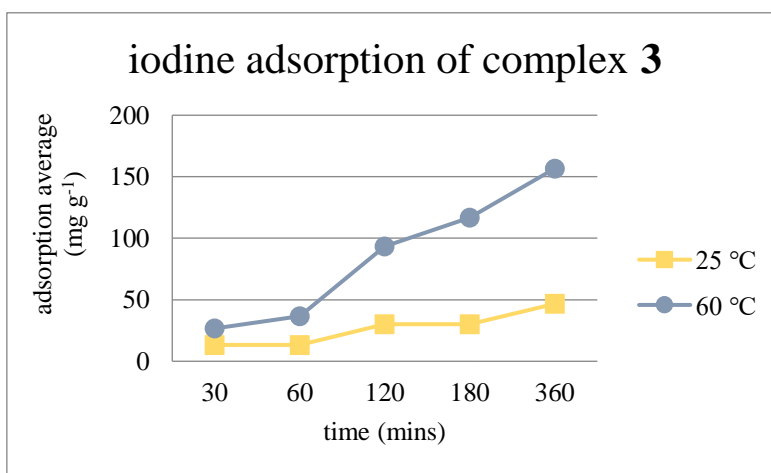

**Table S7.** Iodine adsorption for complex **4** at 25 °C.

| adsorption<br>times<br>(mins) | times | initial<br>weight<br>(mg) | final<br>weight<br>(mg) | iodine<br>content<br>(mg) | adsorbability<br>(mg g <sup>-1</sup> ) | average<br>(mg g <sup>-1</sup> ) |
|-------------------------------|-------|---------------------------|-------------------------|---------------------------|----------------------------------------|----------------------------------|
| 30                            | 1     | 10.0                      | 10.1                    | 0.1                       | 10.0                                   | 3.3                              |
|                               | 2     | 10.0                      | 10.0                    | 0.0                       | 0.0                                    |                                  |
|                               | 3     | 10.0                      | 10.0                    | 0.0                       | 0.0                                    |                                  |
| 60                            | 1     | 10.0                      | 10.1                    | 0.1                       | 10.0                                   | 6.7                              |
|                               | 2     | 10.0                      | 10.0                    | 0.0                       | 0.0                                    |                                  |
|                               | 3     | 10.0                      | 10.1                    | 0.1                       | 10.0                                   |                                  |
| 120                           | 1     | 10.0                      | 10.2                    | 0.2                       | 20.0                                   | 20.0                             |
|                               | 2     | 10.0                      | 10.2                    | 0.2                       | 20.0                                   |                                  |
|                               | 3     | 10.0                      | 10.2                    | 0.2                       | 20.0                                   |                                  |
| 180                           | 1     | 10.0                      | 10.2                    | 0.2                       | 20.0                                   | 20.0                             |
|                               | 2     | 10.0                      | 10.2                    | 0.2                       | 20.0                                   |                                  |
|                               | 3     | 10.0                      | 10.2                    | 0.2                       | 20.0                                   |                                  |
| 360                           | 1     | 10.0                      | 10.2                    | 0.2                       | 20.0                                   | 20.0                             |
|                               | 2     | 10.0                      | 10.2                    | 0.2                       | 20.0                                   |                                  |
|                               | 3     | 10.0                      | 10.2                    | 0.2                       | 20.0                                   |                                  |

**Table S8.** Iodine adsorption for complex **4** at 60 °C.

| adsorption times (mins) | times | initial weight (mg) | final weight (mg) | iodine content (mg) | adsorbability (mg g <sup>-1</sup> ) | average (mg g <sup>-1</sup> ) |
|-------------------------|-------|---------------------|-------------------|---------------------|-------------------------------------|-------------------------------|
| 30                      | 1     | 10.0                | 10.1              | 0.1                 | 10.0                                | 10.0                          |
|                         | 2     | 10.0                | 10.0              | 0.0                 | 0.0                                 |                               |
|                         | 3     | 10.0                | 10.2              | 0.2                 | 20.0                                |                               |
| 60                      | 1     | 10.0                | 10.2              | 0.2                 | 20.0                                | 20.0                          |
|                         | 2     | 10.0                | 10.1              | 0.1                 | 10.0                                |                               |
|                         | 3     | 10.0                | 10.3              | 0.3                 | 30.0                                |                               |
| 120                     | 1     | 10.0                | 10.4              | 0.4                 | 40.0                                | 26.7                          |
|                         | 2     | 10.0                | 10.3              | 0.3                 | 30.0                                |                               |
|                         | 3     | 10.0                | 10.1              | 0.1                 | 10.0                                |                               |
| 180                     | 1     | 10.0                | 10.4              | 0.4                 | 40.0                                | 26.7                          |
|                         | 2     | 10.0                | 10.1              | 0.1                 | 10.0                                |                               |
|                         | 3     | 10.0                | 10.3              | 0.3                 | 30.0                                |                               |
| 360                     | 1     | 10.0                | 10.4              | 0.4                 | 40.0                                | 40.0                          |
|                         | 2     | 10.0                | 10.5              | 0.5                 | 50.0                                |                               |
|                         | 3     | 10.0                | 10.3              | 0.3                 | 30.0                                |                               |

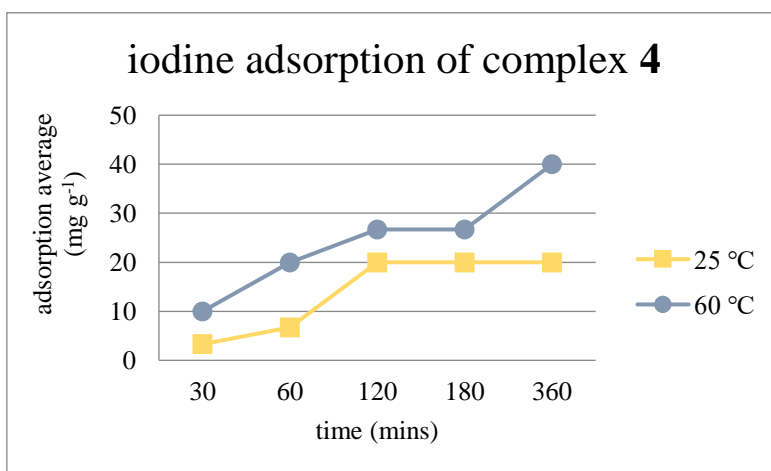

**Table S9.** Iodine adsorption for complex **5** at 25 °C.

| adsorption<br>times<br>(mins) | times | initial<br>weight<br>(mg) | final<br>weight<br>(mg) | iodine<br>content<br>(mg) | adsorbability<br>(mg g <sup>-1</sup> ) | average<br>(mg g <sup>-1</sup> ) |
|-------------------------------|-------|---------------------------|-------------------------|---------------------------|----------------------------------------|----------------------------------|
| 30                            | 1     | 10.0                      | 10.2                    | 0.2                       | 20.0                                   | 10.0                             |
|                               | 2     | 10.0                      | 10.0                    | 0.0                       | 0.0                                    |                                  |
|                               | 3     | 10.0                      | 10.1                    | 0.1                       | 10.0                                   |                                  |
| 60                            | 1     | 10.0                      | 10.2                    | 0.2                       | 20.0                                   | 16.7                             |
|                               | 2     | 10.0                      | 10.1                    | 0.1                       | 10.0                                   |                                  |
|                               | 3     | 10.0                      | 10.2                    | 0.2                       | 20.0                                   |                                  |
| 120                           | 1     | 10.0                      | 10.3                    | 0.3                       | 30.0                                   | 20.0                             |
|                               | 2     | 10.0                      | 10.1                    | 0.1                       | 10.0                                   |                                  |
|                               | 3     | 10.0                      | 10.2                    | 0.2                       | 20.0                                   |                                  |
| 180                           | 1     | 10.0                      | 10.3                    | 0.3                       | 30.0                                   | 30.0                             |
|                               | 2     | 10.0                      | 10.2                    | 0.2                       | 20.0                                   |                                  |
|                               | 3     | 10.0                      | 10.4                    | 0.4                       | 40.0                                   |                                  |
| 360                           | 1     | 10.0                      | 10.4                    | 0.4                       | 40.0                                   | 36.7                             |
|                               | 2     | 10.0                      | 10.3                    | 0.3                       | 30.0                                   |                                  |
|                               | 3     | 10.0                      | 10.4                    | 0.4                       | 40.0                                   |                                  |

**Table S10.** Iodine adsorption for complex **5** at 60 °C.

| adsorption times (mins) | times | initial weight (mg) | final weight (mg) | iodine content (mg) | adsorbability (mg g <sup>-1</sup> ) | average (mg g <sup>-1</sup> ) |
|-------------------------|-------|---------------------|-------------------|---------------------|-------------------------------------|-------------------------------|
| 30                      | 1     | 10.0                | 10.7              | 0.7                 | 70.0                                | 73.3                          |
|                         | 2     | 10.0                | 10.5              | 0.5                 | 50.0                                |                               |
|                         | 3     | 10.0                | 11.0              | 1.0                 | 100.0                               |                               |
| 60                      | 1     | 10.0                | 11.4              | 1.4                 | 140.0                               | 133.3                         |
|                         | 2     | 10.0                | 11.3              | 1.3                 | 130.0                               |                               |
|                         | 3     | 10.0                | 11.3              | 1.3                 | 130.0                               |                               |
| 120                     | 1     | 10.0                | 12.2              | 2.2                 | 220.0                               | 190.0                         |
|                         | 2     | 10.0                | 11.9              | 1.9                 | 190.0                               |                               |
|                         | 3     | 10.0                | 11.6              | 1.6                 | 160.0                               |                               |
| 180                     | 1     | 10.0                | 12.2              | 2.2                 | 220.0                               | 193.3                         |
|                         | 2     | 10.0                | 11.8              | 1.8                 | 180.0                               |                               |
|                         | 3     | 10.0                | 11.8              | 1.8                 | 180.0                               |                               |
| 360                     | 1     | 10.0                | 12.9              | 2.9                 | 290.0                               | 290.0                         |
|                         | 2     | 10.0                | 13.0              | 3.0                 | 300.0                               |                               |
|                         | 3     | 10.0                | 12.8              | 2.8                 | 280.0                               |                               |

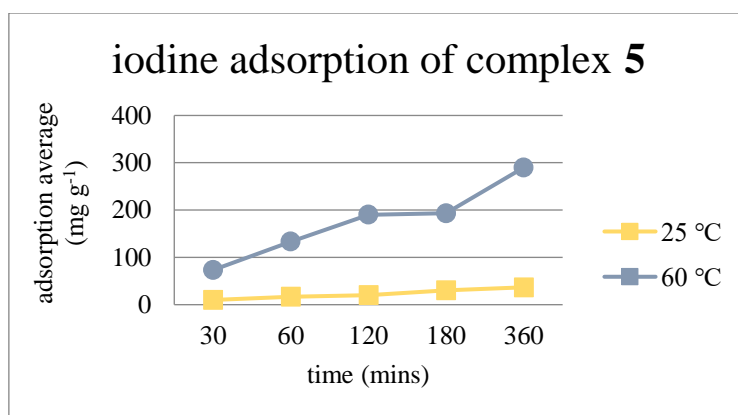



**Table S11.** Iodine adsorption for complex **6** at 25 °C.

| adsorption<br>times<br>(mins) | times | initial<br>weight<br>(mg) | final<br>weight<br>(mg) | iodine<br>content<br>(mg) | adsorbability<br>(mg g <sup>-1</sup> ) | average<br>(mg g <sup>-1</sup> ) |
|-------------------------------|-------|---------------------------|-------------------------|---------------------------|----------------------------------------|----------------------------------|
| 30                            | 1     | 10.0                      | 10.0                    | 0.0                       | 0.0                                    | 0.0                              |
|                               | 2     | 10.0                      | 10.0                    | 0.0                       | 0.0                                    |                                  |
|                               | 3     | 10.0                      | 10.0                    | 0.0                       | 0.0                                    |                                  |
| 60                            | 1     | 10.0                      | 10.1                    | 0.1                       | 10.0                                   | 10.0                             |
|                               | 2     | 10.0                      | 10.1                    | 0.1                       | 10.0                                   |                                  |
|                               | 3     | 10.0                      | 10.1                    | 0.1                       | 10.0                                   |                                  |
| 120                           | 1     | 10.0                      | 10.4                    | 0.4                       | 40.0                                   | 33.3                             |
|                               | 2     | 10.0                      | 10.3                    | 0.3                       | 30.0                                   |                                  |
|                               | 3     | 10.0                      | 10.3                    | 0.3                       | 30.0                                   |                                  |
| 180                           | 1     | 10.0                      | 10.4                    | 0.4                       | 40.0                                   | 40.0                             |
|                               | 2     | 10.0                      | 10.5                    | 0.5                       | 50.0                                   |                                  |
|                               | 3     | 10.0                      | 10.3                    | 0.3                       | 30.0                                   |                                  |
| 360                           | 1     | 10.0                      | 10.7                    | 0.7                       | 70.0                                   | 53.3                             |
|                               | 2     | 10.0                      | 10.5                    | 0.5                       | 50.0                                   |                                  |
|                               | 3     | 10.0                      | 10.4                    | 0.4                       | 40.0                                   |                                  |

**Table S12.** Iodine adsorption for complex **6** at 60 °C.

| adsorption times (mins) | times | initial weight (mg) | final weight (mg) | iodine content (mg) | adsorbability (mg g <sup>-1</sup> ) | average (mg g <sup>-1</sup> ) |
|-------------------------|-------|---------------------|-------------------|---------------------|-------------------------------------|-------------------------------|
| 30                      | 1     | 10.0                | 10.5              | 0.5                 | 50.0                                | 53.3                          |
|                         | 2     | 10.0                | 10.2              | 0.2                 | 20.0                                |                               |
|                         | 3     | 10.0                | 10.9              | 0.9                 | 90.0                                |                               |
| 60                      | 1     | 10.0                | 10.9              | 0.9                 | 90.0                                | 100.0                         |
|                         | 2     | 10.0                | 11.0              | 1.0                 | 100.0                               |                               |
|                         | 3     | 10.0                | 11.1              | 1.1                 | 110.0                               |                               |
| 120                     | 1     | 10.0                | 11.9              | 1.9                 | 190.0                               | 180.0                         |
|                         | 2     | 10.0                | 11.6              | 1.6                 | 160.0                               |                               |
|                         | 3     | 10.0                | 11.9              | 1.9                 | 190.0                               |                               |
| 180                     | 1     | 10.0                | 11.9              | 1.9                 | 190.0                               | 206.7                         |
|                         | 2     | 10.0                | 12.3              | 2.3                 | 230.0                               |                               |
|                         | 3     | 10.0                | 12.0              | 2.0                 | 200.0                               |                               |
| 360                     | 1     | 10.0                | 12.3              | 2.3                 | 230.0                               | 243.3                         |
|                         | 2     | 10.0                | 12.5              | 2.5                 | 250.0                               |                               |
|                         | 3     | 10.0                | 12.5              | 2.5                 | 250.0                               |                               |

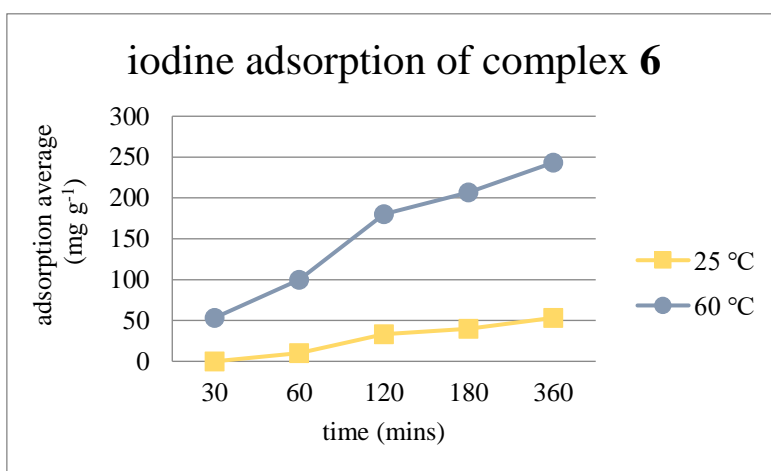

**Fig. S31.** PXRD patterns for **1** after iodine adsorption at 25 °C.

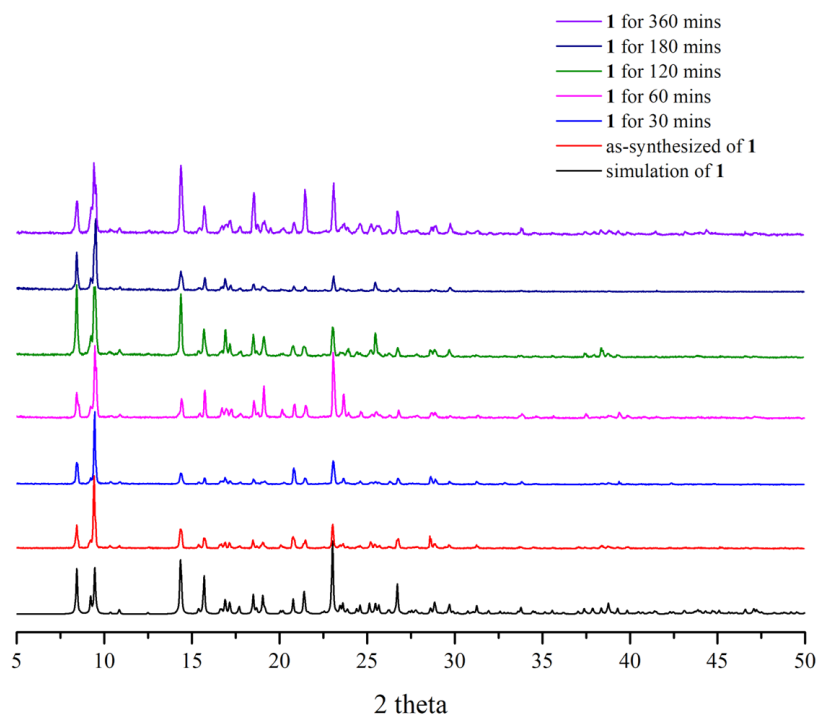

**Fig. S32.** PXRD patterns for **1** after iodine adsorption at 60 °C.

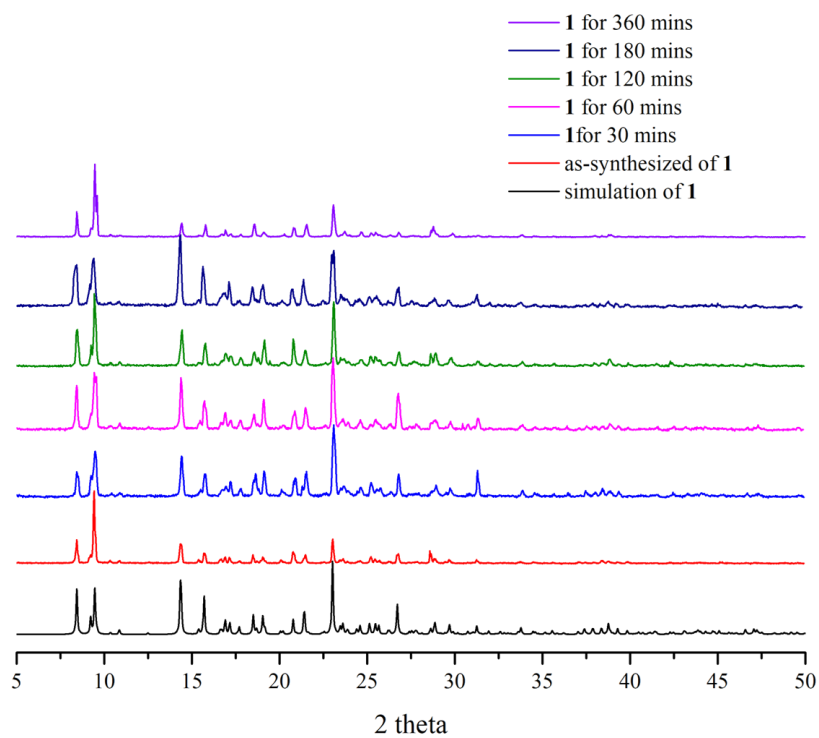

**Fig. S33.** PXRD patterns for **2** after iodine adsorption at 25 °C.

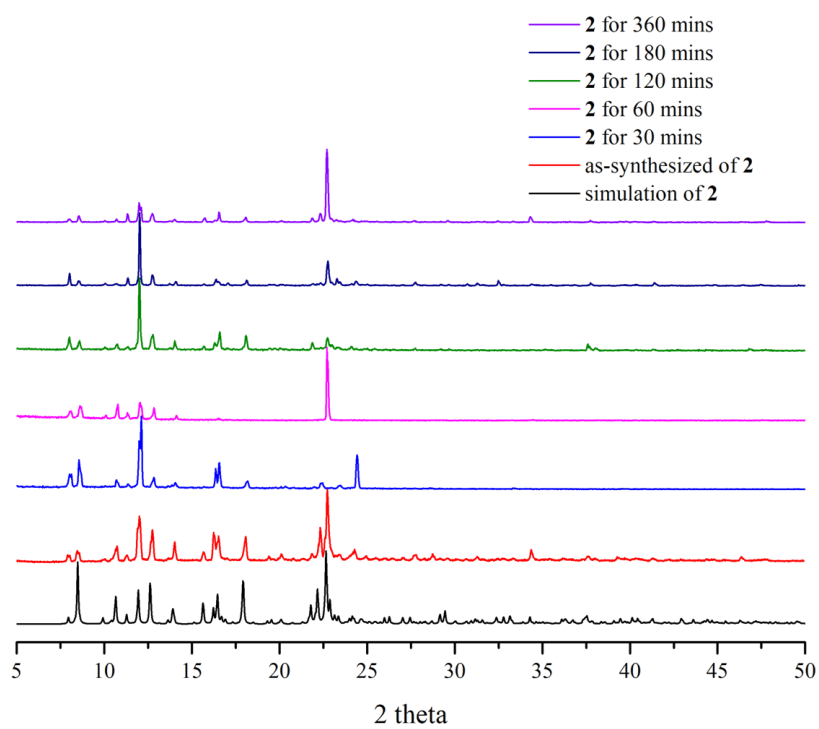

**Fig. S34.** PXRD patterns for **2** after iodine adsorption at 60 °C.

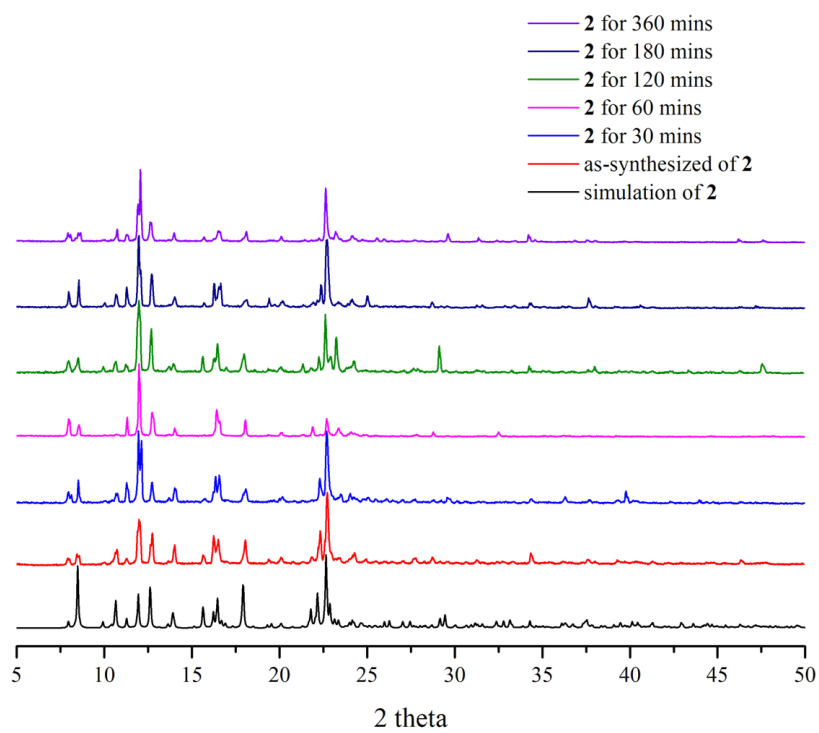

**Fig. S35.** PXRD patterns for **3** after iodine adsorption at 25 °C.

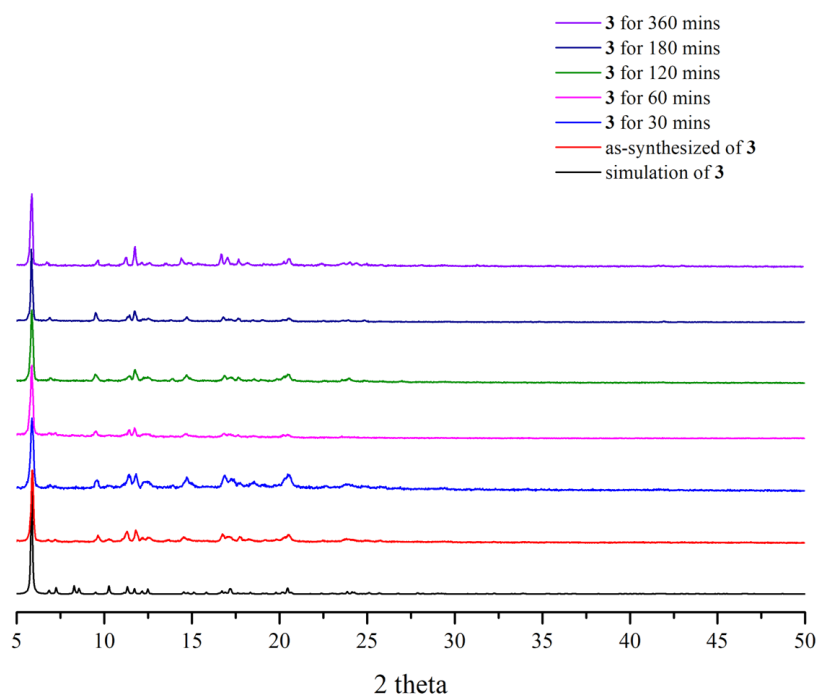

**Fig. S36.** PXRD patterns for **3** after iodine adsorption at 60 °C.

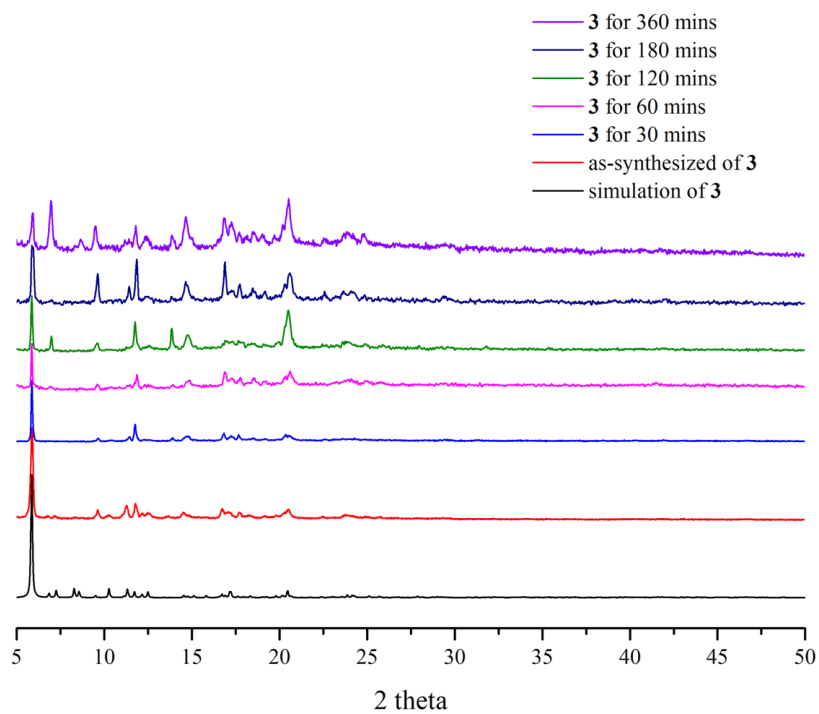



**Fig. S37.** PXRD patterns for **4** after iodine adsorption at 25 °C.

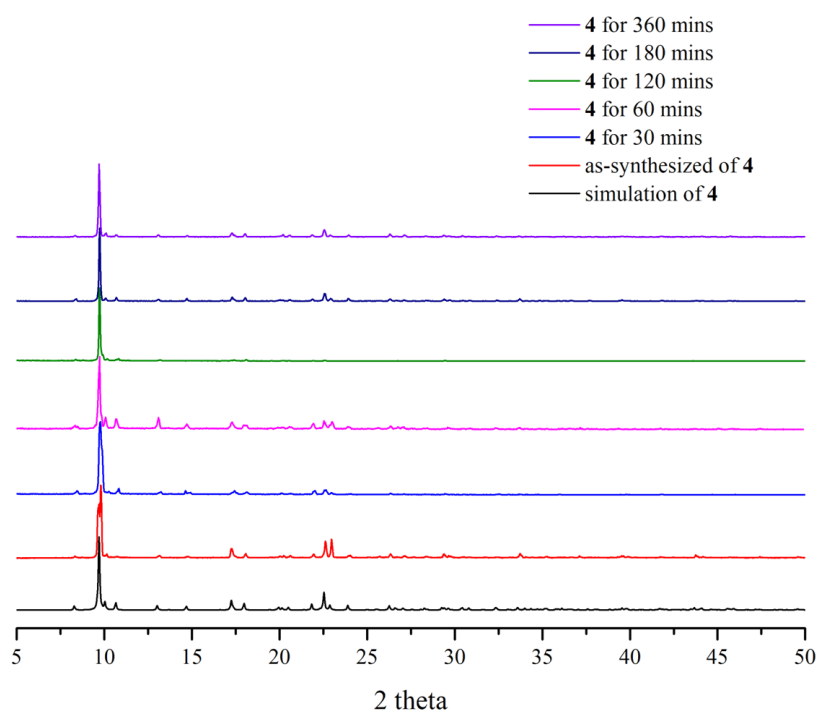

**Fig. S38.** PXRD patterns for **4** after iodine adsorption at 60 °C.

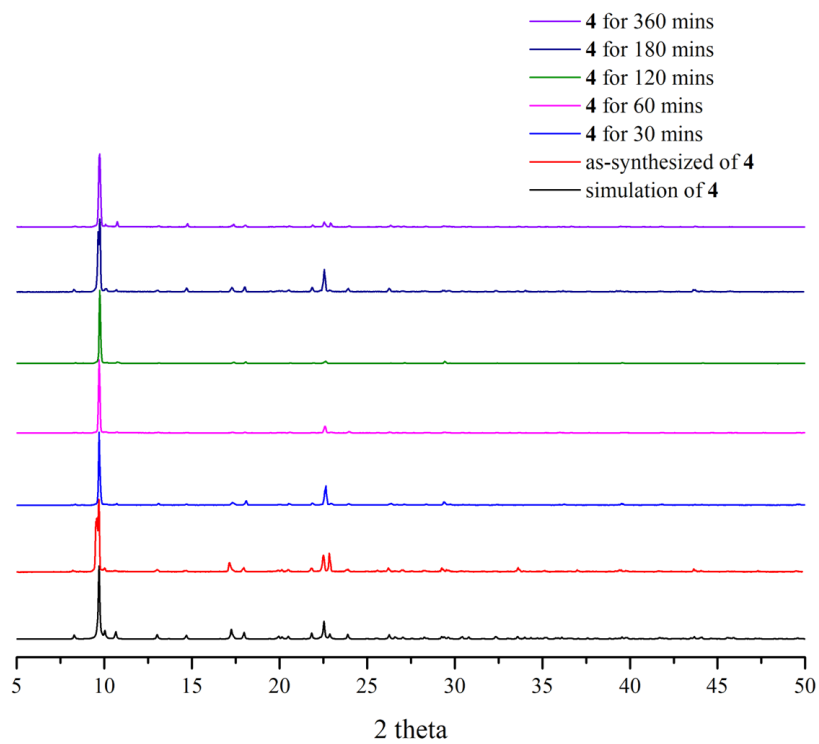

**Fig. S39.** PXRD patterns for **5** after iodine adsorption at 25 °C.

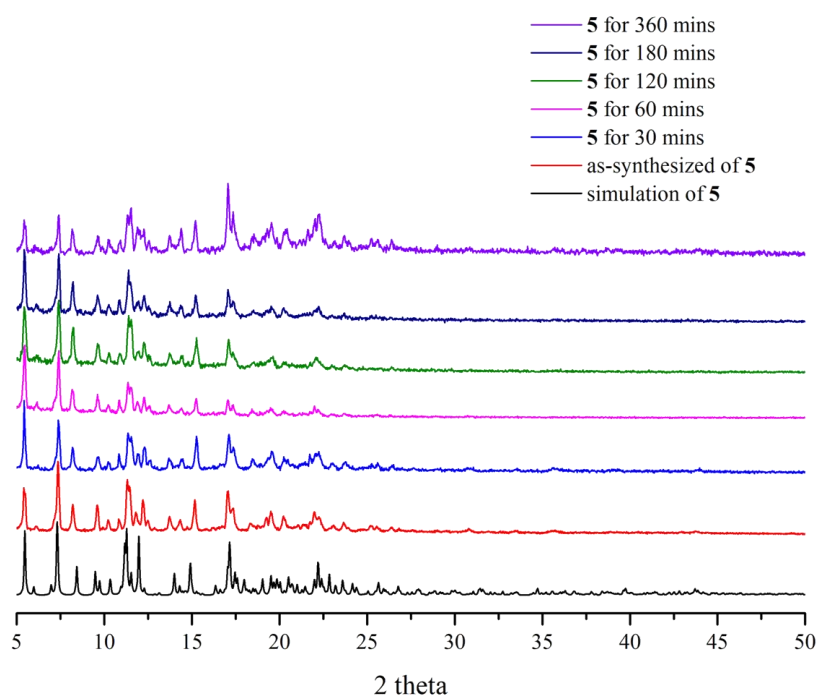

**Fig. S40.** PXRD patterns for **5** after iodine adsorption at 60 °C.

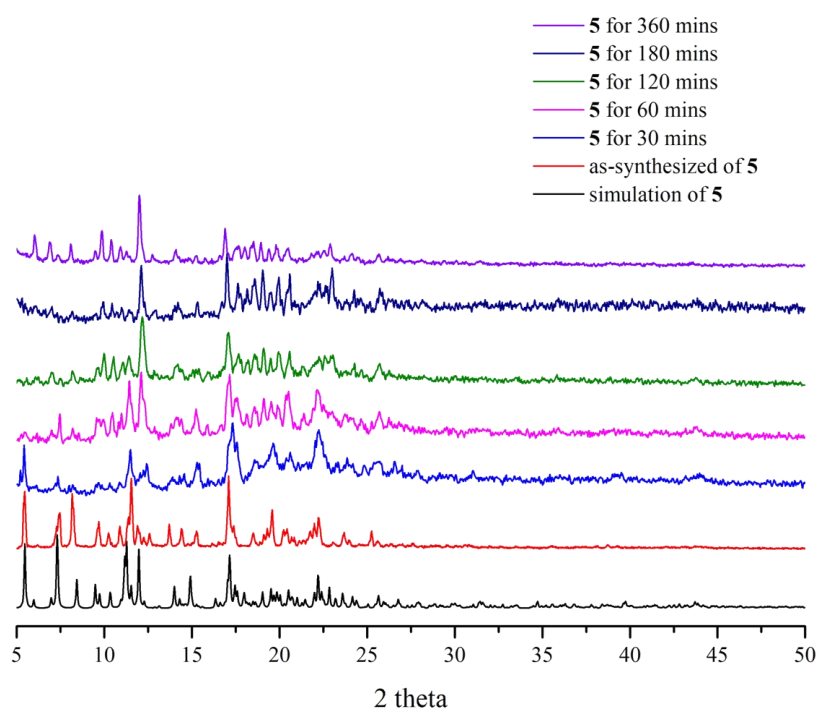

**Fig. S41.** PXRD patterns for **6** after iodine adsorption at 25 °C.

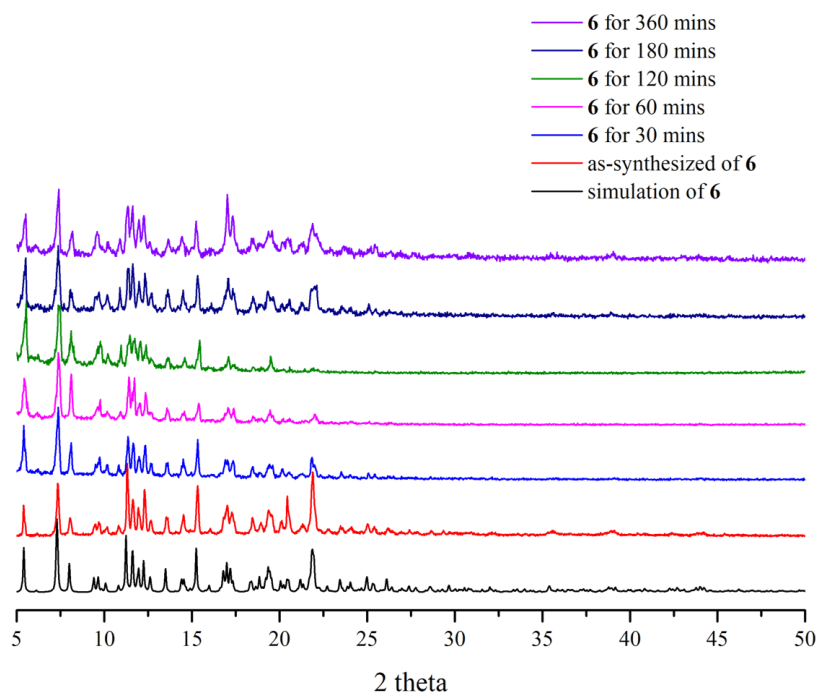

**Fig. S42.** PXRD patterns for **6** after iodine adsorption at 60 °C.

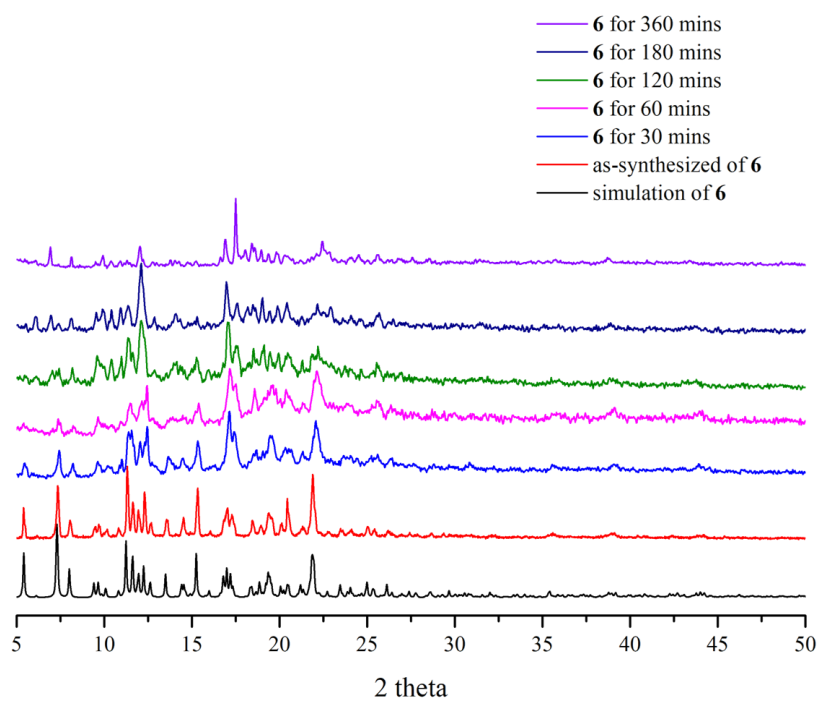

**Fig. S43.** EDX spectrum and data of complex **1**.

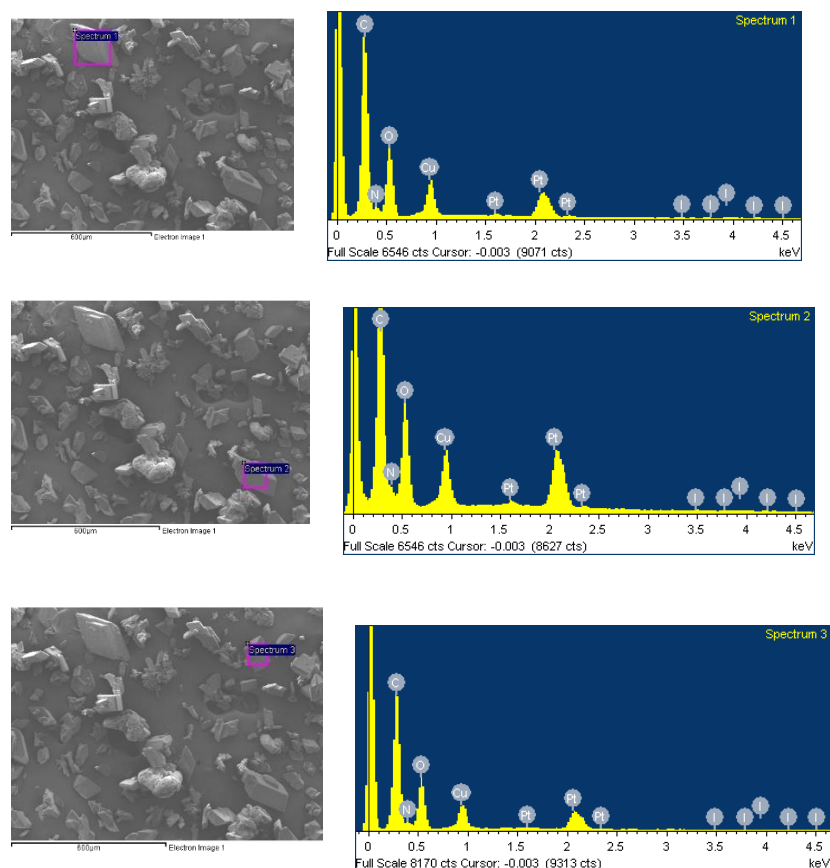

EDX data at three different positions for complex **1**.

|         | 1st     |         | 2nd     |         | 3rd     |         |
|---------|---------|---------|---------|---------|---------|---------|
| Element | Weight% | Atomic% | Weight% | Atomic% | Weight% | Atomic% |
| C K     | 52.76   | 65.02   | 48.48   | 59.19   | 54.73   | 66.59   |
| O K     | 25.85   | 23.93   | 25.25   | 23.05   | 26.77   | 24.45   |
| N K     | 7.57    | 8.01    | 13.97   | 14.50   | 5.95    | 6.20    |
| Cu L    | 12.33   | 2.87    | 11.55   | 2.51    | 11.44   | 2.63    |
| I L     | 1.49    | 0.17    | 0.75    | 0.75    | 1.11    | 0.13    |
| Totals  | 100.00  |         | 100.00  |         | 100.00  |         |

Average data

| Element | Weight% | Atomic% |
|---------|---------|---------|
| C K     | 51.99   | 63.60   |
| O K     | 25.96   | 23.81   |
| N K     | 9.16    | 9.57    |
| Cu L    | 11.77   | 2.67    |
| I L     | 1.12    | 0.35    |
| Totals  | 100.00  |         |

**Fig. S44.** EDX spectrum and data of complex **2**.

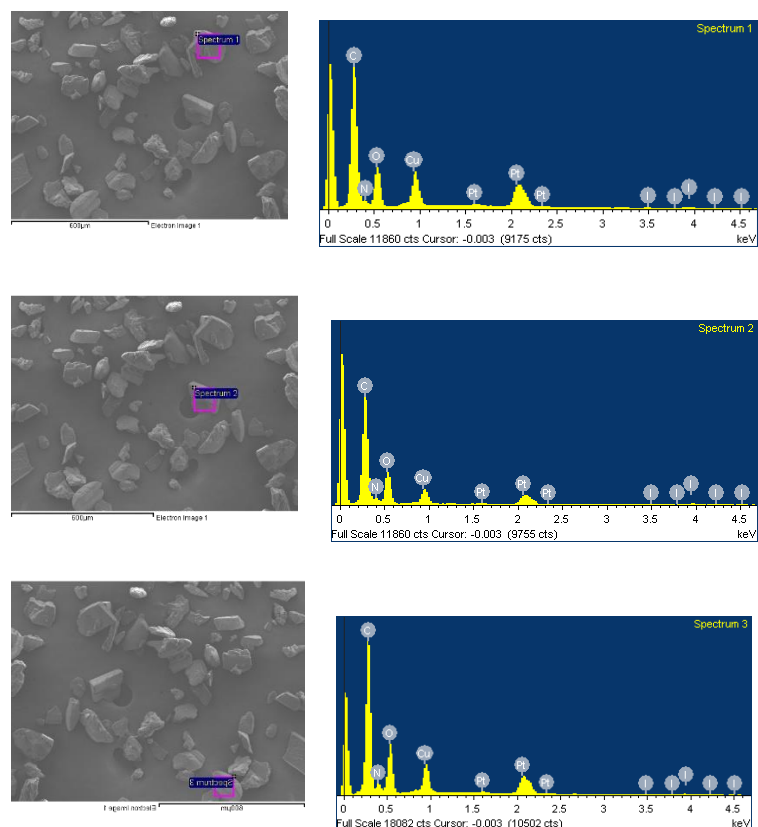

EDX data at three different positions for complex **2**.

|         | 1st     |         | 2nd     |         | 3rd     |         |
|---------|---------|---------|---------|---------|---------|---------|
| Element | Weight% | Atomic% | Weight% | Atomic% | Weight% | Atomic% |
| C K     | 55.27   | 69.73   | 57.34   | 70.61   | 53.18   | 65.46   |
| O K     | 19.68   | 18.64   | 23.21   | 21.46   | 22.69   | 20.97   |
| N K     | 7.13    | 7.71    | 4.74    | 5.00    | 9.99    | 10.55   |
| Cu L    | 14.94   | 3.56    | 10.40   | 2.42    | 11.87   | 2.76    |
| I L     | 2.98    | 0.36    | 4.31    | 0.51    | 2.27    | 0.26    |
| Totals  | 100.00  |         | 100.00  |         | 100.00  |         |

Average data

| Element | Weight% | Atomic% |
|---------|---------|---------|
| C K     | 55.26   | 68.60   |
| O K     | 21.86   | 20.36   |
| N K     | 7.29    | 7.75    |
| Cu L    | 12.40   | 2.91    |
| I L     | 3.19    | 0.38    |
| Totals  | 100.00  |         |



**Fig. S45.** EDX spectrum and data of complex **3**.

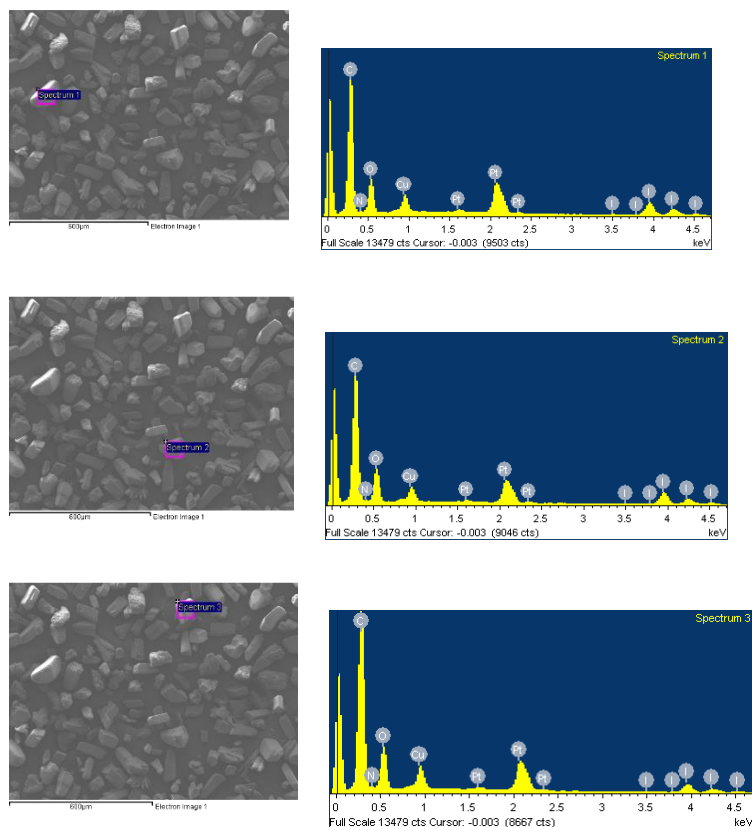

EDX data at three different positions for complex **3**.

|         | 1st     |         | 2nd     |         | 3rd     |         |
|---------|---------|---------|---------|---------|---------|---------|
| Element | Weight% | Atomic% | Weight% | Atomic% | Weight% | Atomic% |
| C K     | 49.91   | 76.29   | 49.98   | 76.91   | 58.72   | 79.11   |
| O K     | 13.37   | 15.36   | 14.55   | 16.80   | 16.35   | 16.54   |
| N K     | 1.64    | 2.15    | 0.00    | 0.00    | 0.00    | 0.00    |
| Cu L    | 7.83    | 2.26    | 7.69    | 2.24    | 9.18    | 2.34    |
| I L     | 27.25   | 3.94    | 27.78   | 4.05    | 15.75   | 2.01    |
| Totals  | 100.00  |         | 100.00  |         | 100.00  |         |

Average data

| Element | Weight% | Atomic% |
|---------|---------|---------|
| C K     | 52.87   | 77.44   |
| O K     | 14.76   | 16.23   |
| N K     | 0.55    | 0.72    |
| Cu L    | 8.23    | 2.28    |
| I L     | 23.59   | 3.33    |
| Totals  | 100.00  |         |

**Fig. S46.** EDX spectrum and data of complex 4.

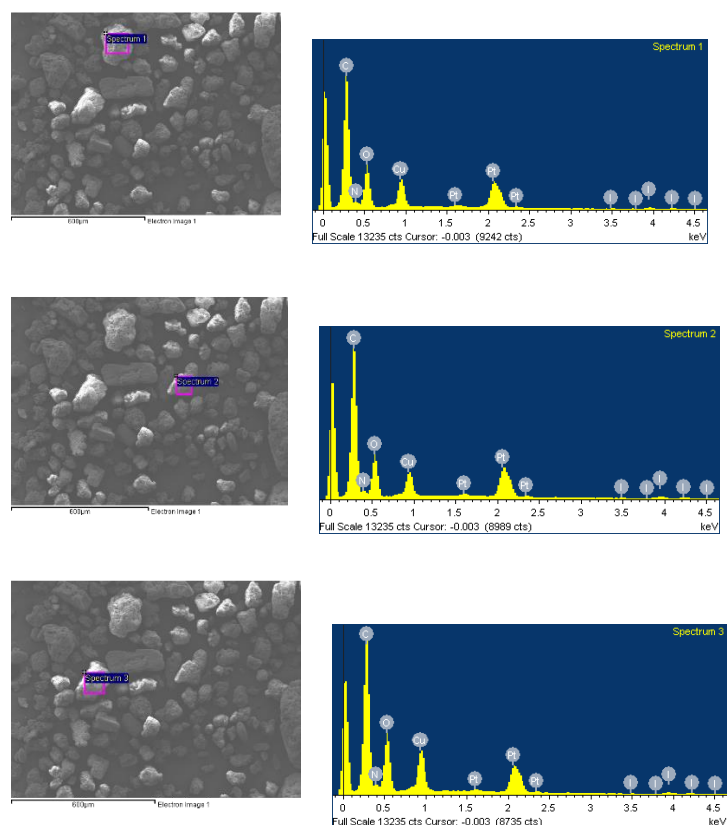

EDX data at three different positions for complex 4.

|         | 1st     |         | 2nd     |         | 3rd     |         |
|---------|---------|---------|---------|---------|---------|---------|
| Element | Weight% | Atomic% | Weight% | Atomic% | Weight% | Atomic% |
| C K     | 54.74   | 68.61   | 58.82   | 72.46   | 52.58   | 66.57   |
| O K     | 21.44   | 20.18   | 20.98   | 19.40   | 23.05   | 21.92   |
| N K     | 7.19    | 7.73    | 4.82    | 5.08    | 7.07    | 7.66    |
| Cu L    | 12.73   | 3.01    | 10.88   | 2.53    | 14.80   | 3.55    |
| I L     | 3.90    | 0.47    | 4.50    | 0.53    | 2.50    | 0.30    |
| Totals  | 100.00  |         | 100.00  |         | 100.00  |         |

Average data

| Element | Weight% | Atomic% |
|---------|---------|---------|
| C K     | 55.38   | 69.21   |
| O K     | 21.82   | 20.50   |
| N K     | 6.36    | 6.82    |
| Cu L    | 12.80   | 3.03    |
| I L     | 3.64    | 0.434   |
| Totals  | 100.00  |         |

**Fig. S47.** EDX spectrum and data of complex **5**.

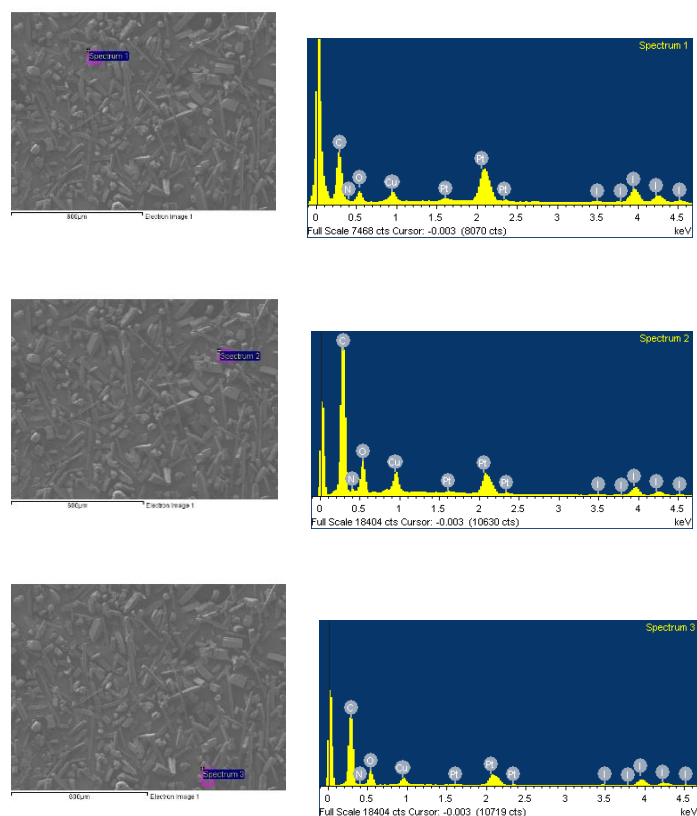

**EDX data at three different positions for complex **5**.**

|         | 1st     |         | 2nd     |         | 3rd     |         |
|---------|---------|---------|---------|---------|---------|---------|
| Element | Weight% | Atomic% | Weight% | Atomic% | Weight% | Atomic% |
| C K     | 35.28   | 67.64   | 54.46   | 77.07   | 51.25   | 79.71   |
| O K     | 7.36    | 11.26   | 13.67   | 14.5    | 11.91   | 13.89   |
| N K     | 6.85    | 10.59   | 2.69    | 3.25    | 0.00    | 0.00    |
| Cu L    | 7.44    | 2.69    | 9.28    | 2.49    | 6.65    | 1.95    |
| I L     | 43.07   | 7.82    | 19.90   | 2.67    | 30.19   | 4.45    |
| Totals  | 100.00  |         | 100.00  |         | 100.00  |         |

**Average data**

| Element | Weight% | Atomic% |
|---------|---------|---------|
| C K     | 47.00   | 74.81   |
| O K     | 10.98   | 13.22   |
| N K     | 3.18    | 4.61    |
| Cu L    | 7.79    | 2.38    |
| I L     | 31.05   | 4.98    |
| Totals  | 100.00  |         |

**Fig. S48.** EDX spectrum and data of complex **6**.

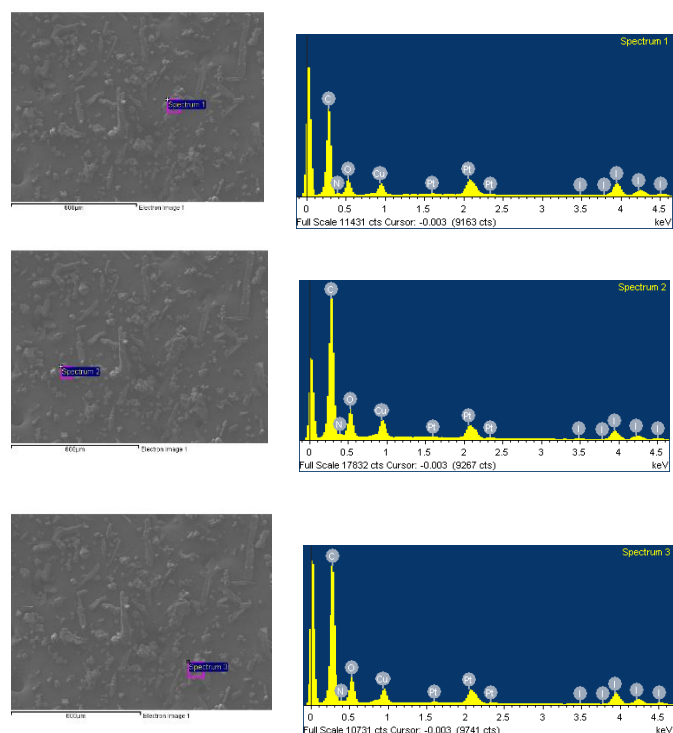

**EDX data at three different positions for complex **6**.**

|         | 1st     |         | 2nd     |         | 3rd     |         |
|---------|---------|---------|---------|---------|---------|---------|
| Element | Weight% | Atomic% | Weight% | Atomic% | Weight% | Atomic% |
| C K     | 45.95   | 79.62   | 55.97   | 80.19   | 52.40   | 80.24   |
| O K     | 9.01    | 11.72   | 13.44   | 14.46   | 11.74   | 13.49   |
| Cu L    | 7.80    | 2.55    | 8.92    | 2.41    | 7.44    | 2.15    |
| I L     | 37.24   | 6.11    | 21.67   | 2.94    | 28.42   | 4.12    |
| Totals  | 100.00  |         | 100.00  |         | 100.00  |         |

**Average data**

| Element | Weight% | Atomic% |
|---------|---------|---------|
| C K     | 51.44   | 80.02   |
| O K     | 11.40   | 13.223  |
| Cu L    | 8.05    | 2.37    |
| I L     | 29.11   | 4.39    |
| Totals  | 100.00  |         |

**Fig. S49.** PXRD patterns of complex **1** heated at 120 °C for 24 h.

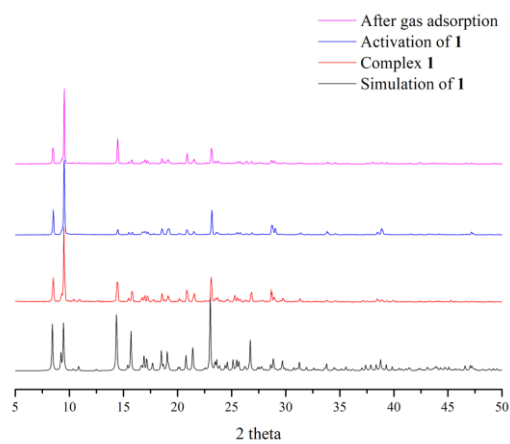

**Fig. S50.** PXRD patterns of complex **2** heated at 120 °C for 24 h.

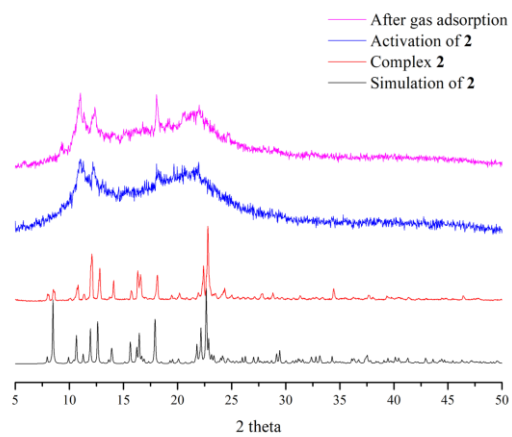

**Fig. S51.** PXRD patterns of complex **3** heated at 120 °C for 24 h.

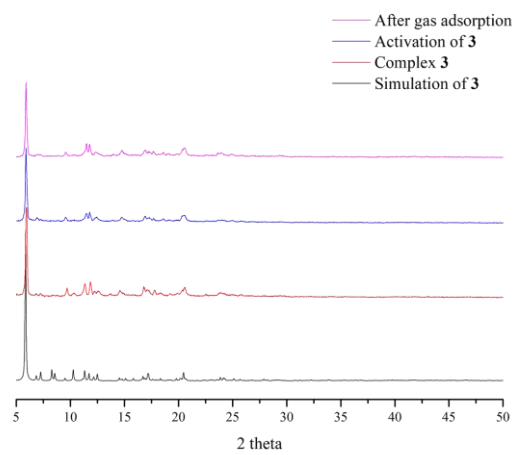

**Fig. S52.** PXRD patterns of complex **4** heated at 120 °C for 24 h.

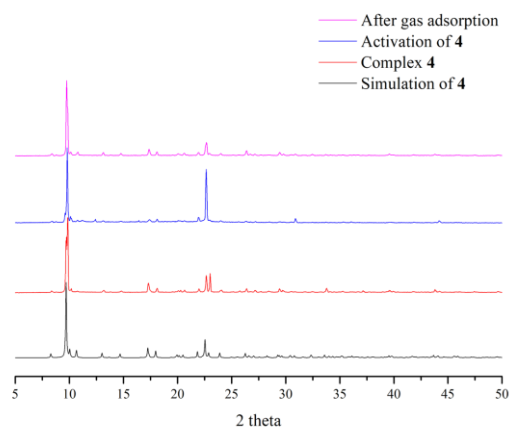



**Fig. S53.** PXRD patterns of complex **5** heated at 120 °C for 24 h.

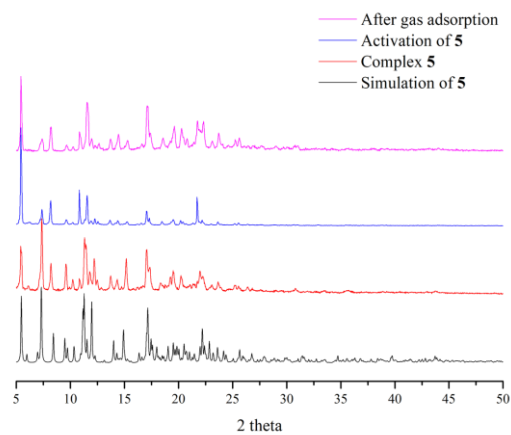

**Fig. S54.** PXRD patterns of complex **6** heated at 120 °C for 24 h.

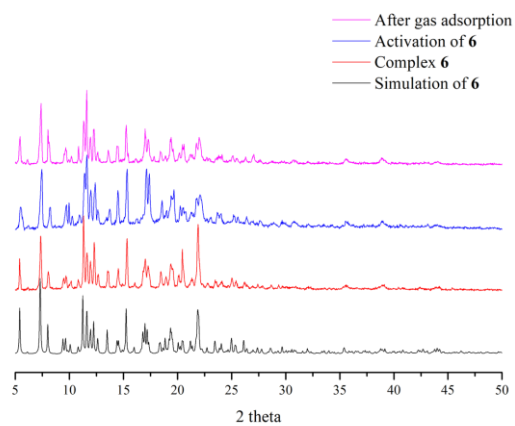

**Fig. S55.** N<sub>2</sub> adsorption–desorption isotherms for complex **1** at 77 K.

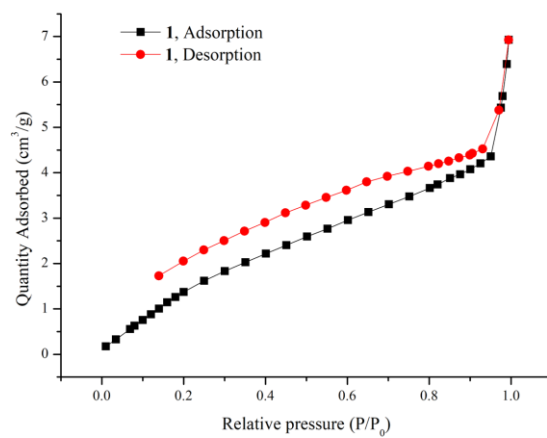

**Fig. S56.** N<sub>2</sub> adsorption–desorption isotherms for complex **2** at 77 K.

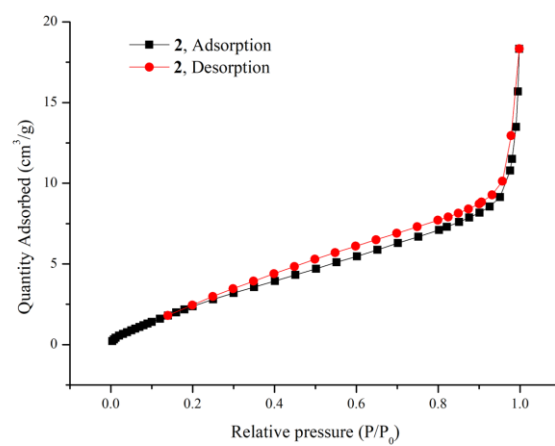

**Fig. S57.** N<sub>2</sub> adsorption–desorption isotherms for complex **3** at 77 K.

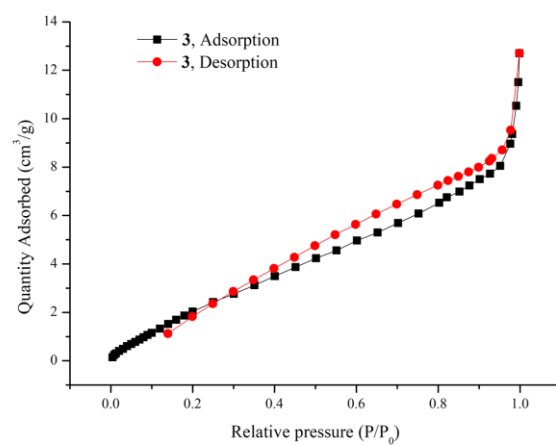

**Fig. S58.** N<sub>2</sub> adsorption–desorption isotherms for complex **4** at 77 K.

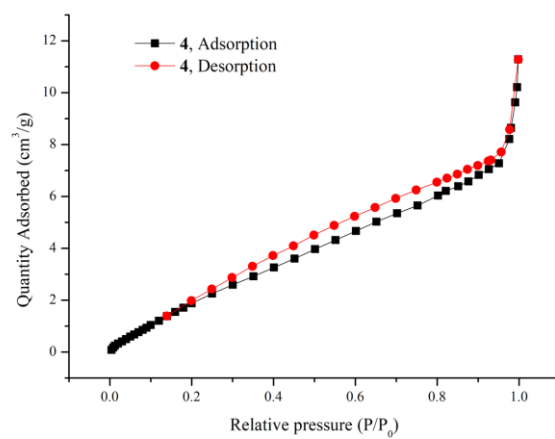

**Fig. S59.** N<sub>2</sub> adsorption–desorption isotherms for complex **5** at 77 K.

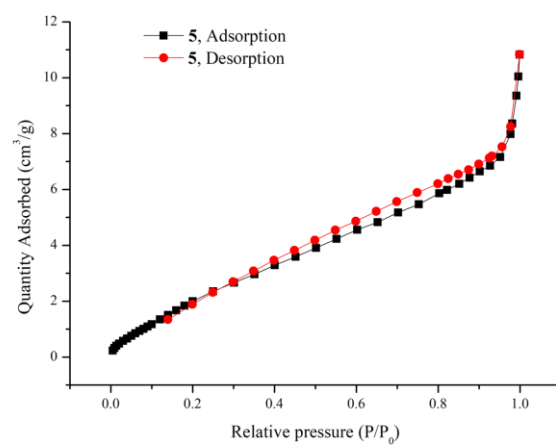

**Fig. S60.** N<sub>2</sub> adsorption–desorption isotherms for complex **6** at 77 K.

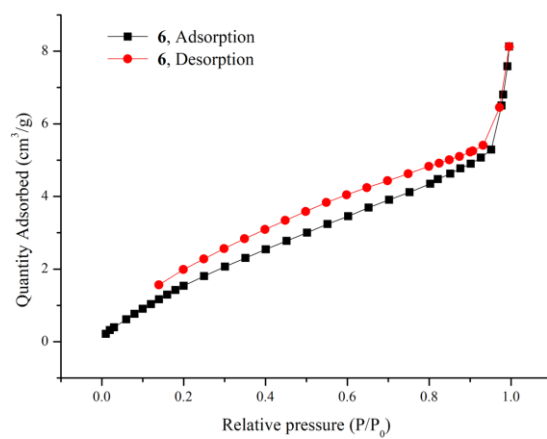



**Fig. S61.** Pore-size distribution curve for complex 1.

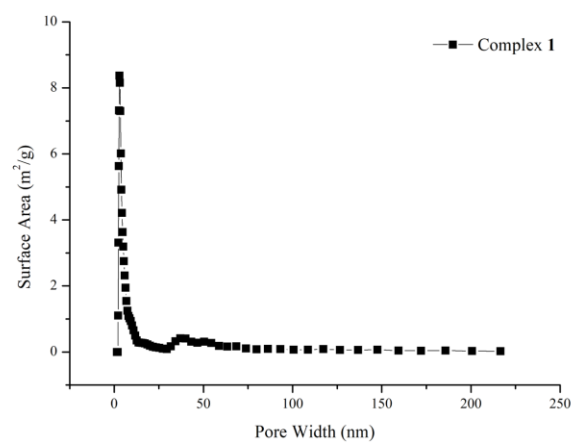

**Fig. S62.** Pore-size distribution curve for complex 2.

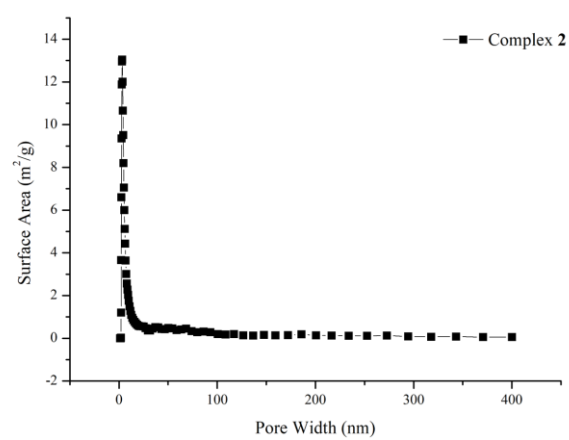

**Fig. S63.** Pore-size distribution curve for complex **3**.

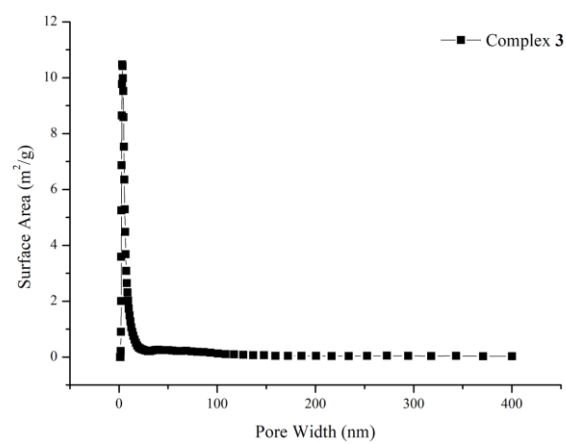

**Fig. S64.** Pore-size distribution curve for complex 4.

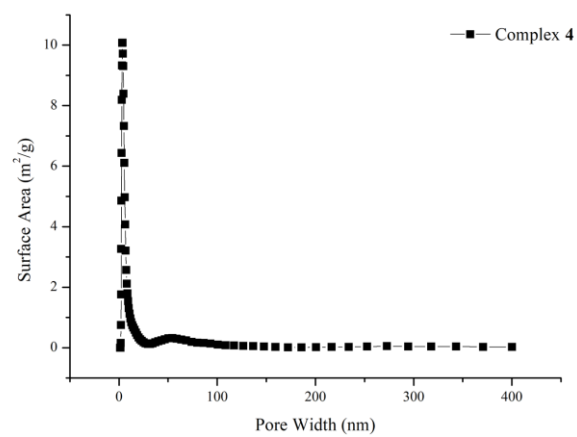

**Fig. S65.** Pore-size distribution curve for complex **5**.

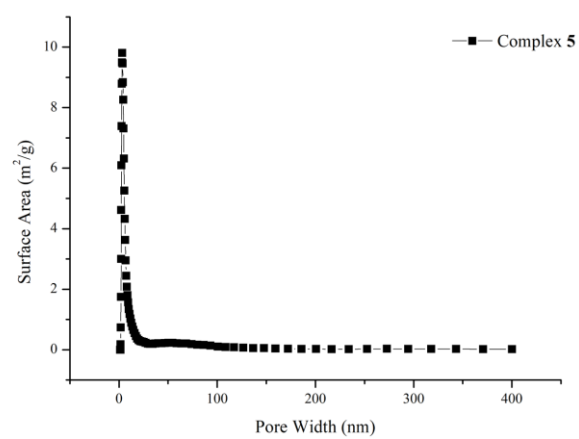

**Fig. S66.** Pore-size distribution curve for complex **6**.

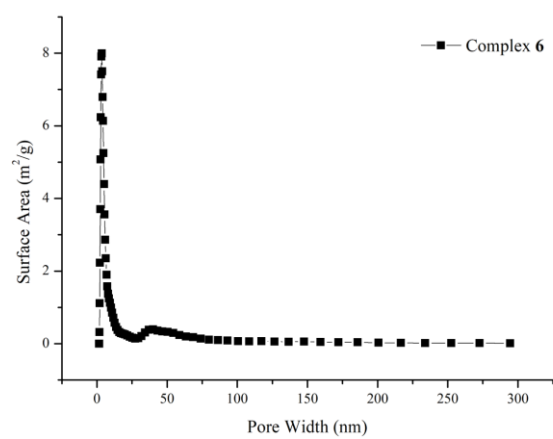

Supplement: Supplementary file 2 [file supplementary]
